1 **Ecophysiology and genomics of the brackish water adapted SAR11 subclade IIIa**

2

3 V. Celeste Lanclos<sup>1</sup>, Anna N. Rasmussen<sup>2</sup>, Conner Y. Kojima<sup>1</sup>, Chuankai Cheng<sup>1</sup>, Michael W.  
4 Henson<sup>3</sup>, Brant C. Faircloth<sup>4</sup>, Christopher A. Francis<sup>2</sup>, and J. Cameron Thrash<sup>1\*</sup>

5

6 <sup>1</sup>Department of Biological Sciences, University of Southern California, Los Angeles, CA 90089

7

8 <sup>2</sup>Department of Earth System Science, Stanford University, Stanford, CA 94305

9

10 <sup>3</sup> Department of Geophysical Sciences, University of Chicago, Chicago, IL 60637

11

12 <sup>4</sup>Department of Biological Sciences and Museum of Natural Science, Louisiana State  
13 University, Baton Rouge, LA, 70803

14

15

16 #Correspondence:

17 J. Cameron Thrash

18 University of Southern California

19 Department of Biological Sciences

20 3616 Trousdale Pkwy AHF 107

21 Los Angeles, CA 90089

22 thrash@usc.edu

23

24

25

26

27

28 Key words: SAR11, isolation, pangenomics, metagenomics, microbial ecology

29

30

31

32

33

34

35

36

37

38

39

40

41 **Abstract**

42 The Order Pelagibacterales (SAR11) is the most abundant group of heterotrophic  
43 bacterioplankton in global oceans and comprises multiple subclades with unique spatiotemporal  
44 distributions. Subclade IIIa is the primary SAR11 group in brackish waters and shares a common  
45 ancestor with the dominant freshwater IIIb (LD12) subclade. Despite its dominance in brackish  
46 environments, subclade IIIa lacks systematic genomic or ecological studies. Here, we combine  
47 closed genomes from new IIIa isolates, new IIIa MAGS from San Francisco Bay (SFB), and 466  
48 high-quality publicly available SAR11 genomes for the most comprehensive pangenomic study  
49 of subclade IIIa to date. Subclade IIIa represents a taxonomic family containing three genera  
50 (denoted as subgroups IIIa.1, IIIa.2, and IIIa.3) that had distinct ecological distributions related  
51 to salinity. The expansion of taxon selection within subclade IIIa also established previously  
52 noted metabolic differentiation in subclade IIIa compared to other SAR11 subclades such as  
53 glycine/serine prototrophy, mosaic glyoxylate shunt presence, and polyhydroxyalkanoate  
54 synthesis potential. Our analysis further shows metabolic flexibility among subgroups within  
55 IIIa. Additionally, we find that subclade IIIa.3 bridges the marine and freshwater clades based on  
56 its potential for compatible solute transport, iron utilization, and bicarbonate management  
57 potential. Pure culture experimentation validated differential salinity ranges in IIIa.1 and IIIa.3  
58 and provided the first IIIa cell size and volume data. This study is an important step forward for  
59 understanding the genomic, ecological, and physiological differentiation of subclade IIIa and the  
60 overall evolutionary history of SAR11.

61  
62  
63

## 64 **Introduction**

65 The SAR11 clade (Pelagibacterales) is a diverse order of bacterioplankton that constitutes up to  
66 40% of heterotrophic bacteria in surface global oceans (1, 2). The clade encompasses multiple  
67 subclades that exhibit unique spatiotemporal distributions in global waters corresponding to the  
68 group's phylogenetic structure (1, 3). Much of what is known about SAR11 comes from  
69 subclade I and the well-characterized strains HTCC1062 and HTCC7211 (4–6). Studies focused  
70 on these organisms and other genomes within Ia defined SAR11 as canonical genome-  
71 streamlined oligotrophic marine heterotrophs (7–9) with specific nutrient requirements (10),  
72 simple regulatory systems (7, 11, 12), auxotrophies for key amino acids and vitamins (13, 14),  
73 partitioning of carbon flow for assimilation or energy based on external nutrient concentrations  
74 (15), and sensitivity to purifying selection within closely related populations (16). Studies of  
75 non-Ia SAR11 subclades have provided evidence of additional subclade-specific genomic  
76 adaptations and biogeography. For example, subclade Ic contains subtle genomic changes such  
77 as amino acid composition, increased intergenic spacer size, and genes encoding for cell wall  
78 components as likely adaptations to the bathypelagic (17). Some subclade II members possessed  
79 genes for nitrate reduction in oxygen minimum zones, providing the first evidence of facultative  
80 anaerobic metabolism in SAR11 (18). The freshwater LD12/IIIb subclade was recently  
81 cultivated and its growth in low brackish salinities and loss of osmoregulation genes provides a  
82 hypothesis for SAR11 adaptation into freshwater ecosystems (19, 20).

83  
84 Another important SAR11 subclade, IIIa, which shares a most recent common ancestor with the  
85 freshwater LD12/IIIb group (3, 19) (hereafter LD12), has received comparatively little attention  
86 despite being a key group to study the evolutionary transition of SAR11 from marine to fresh  
87 water. To date, there are only two reported isolates, HIMB114 (8) and IMCC9063 (21) but this  
88 lack of systematic study is not indicative of IIIa's relevance in global aquatic systems. IIIa is the  
89 most abundant SAR11 subclade in brackish waters and its distribution varies based on salinity  
90 and phylogenetic position, with two primary branches represented by the two isolates and their  
91 genomes (22, 23). In a survey of the Baltic Sea, the IMCC9063-type of SAR11 was the more  
92 abundant representative in brackish waters (salinity < 10) while the HIMB114-type peaked in  
93 high-brackish to marine salinities (22). A similar trend has also been seen across northern Gulf of  
94 Mexico estuaries in which multiple operational taxonomic units (OTUs) of SAR11 IIIa were  
95 separated ecologically by salinities above and below ~10 (23). In the San Francisco Bay (SFB), a  
96 16S rRNA amplicon OTU-based study also found subclade IIIa to dominate at mesohaline  
97 salinities (24). Additionally, the two established branches of IIIa were separated by temperature  
98 and latitude in polar versus temperate waters (25). Despite evidence of niche separation based on  
99 their environmental distributions, the temperature and salinity tolerances of these organisms have  
100 not been tested experimentally.

101  
102 There is a comparative paucity of information about subclade IIIa relative to other SAR11, and  
103 only limited information has been gleaned from studies using comparative genomics thus far.

104 Neither IIIa representative contains a complete glycolytic pathway, though the neighboring  
105 subclade LD12 contains a typical EMP pathway (19) and some subclade I representatives have a  
106 variant of the ED pathway (26). While all SAR11 members are reliant on reduced sulfur, neither  
107 HIMB114 nor IMCC9063 have the genomic potential to use DMSO or DMSP like other SAR11  
108 strains (15, 27–29). The extensive C1 metabolism found in other SAR11 strains is also lacking in  
109 IIIa genomes (17). Contrary to other SAR11 members, HIMB114 and IMCC9063 have been  
110 reported to contain *serABC* for glycine/serine prototrophy and IMCC9063 also contains a *tenA*  
111 homolog not found in subclade I that may allow for AmMP rather than HMP to serve as a  
112 thiamin source (14). Together, these genomic predictions suggest that IIIa is fundamentally  
113 different from other SAR11 clades in some aspects of metabolic potential which aligns with the  
114 general SAR11 trend of phylogeny reflecting the unique ecology and genomic novelty of  
115 particular clades. Furthermore, 16S rRNA gene and phylogenomic trees indicate at least three  
116 separate IIIa subgroups instead of only two, raising questions about possible additional genomic  
117 and ecological diversification within IIIa (3, 30).

118  
119 To improve our understanding of the genomic, ecological, and physiological variation present in  
120 SAR11 subclade IIIa, we conducted a comprehensive study leveraging new isolates, three closed  
121 genomes from these strains, and an additional 468 SAR11 genomes that included new and  
122 publicly available metagenome-assembled genomes (MAGs), single-amplified genomes (SAGs),  
123 and 1059 metagenomic samples from a variety of aquatic habitats. We examined the  
124 pangenomics and global ecology of the group as well as pure culture physiology from two of our  
125 isolates. Our results provide strong evidence for three genera within IIIa (IIIa.1, IIIa.2, and  
126 IIIa.3) whose ecological distribution is defined at least partially by salinity. We define the  
127 genomic adaptations that separate IIIa from the rest of SAR11, the three subgroups within IIIa  
128 from each other, and partially characterize the physiology and morphology of two isolates from  
129 the IIIa branches with cultured representatives. Our SAR11 IIIa strains grown in defined and  
130 complex artificial seawater medium, as well as their genomes, provide new opportunities for  
131 detailed study of this group.

132

## 133 **Materials and Methods**

134

### 135 *Isolation, genome sequencing, and assembly*

136 All strains were isolated using high throughput dilution-to-extinction methods and identified  
137 through 16S rRNA gene sequences as previously reported (25, 31). DNA for strain LSUCC0261  
138 was sequenced using Illumina HiSeq after library preparation as previously reported (19) at the  
139 Oklahoma Medical Research Facility. DNA for strains LSUCC0664 and LSUCC0723 was sent  
140 to the Argonne National Laboratory Environmental Sample Preparation and Sequencing Facility  
141 for library preparation and sequencing. We trimmed reads with Trimmomatic v0.36 and  
142 assembled trimmed reads for all genomes with SPAdes v3.10.1 (32) using default parameters  
143 with coverage cutoff set to “auto”. We verified closure of the genomes and checked the

144 assemblies for contamination using CheckM v1.0.5 (33) with “lineage\_wf”. See **Supplemental**  
145 **Text** for detailed methods on isolation, sequencing, assembly, binning, and genome closure  
146 verification.

147

#### 148 *Comparative genomics, and genome characteristics*

149 Subgroups within SAR11 were delineated using phylogenetic branching (**Supplemental Text**),  
150 16S rRNA gene BLAST identity, and average and average amino acid identity (AAI)  
151 (<https://github.com/dparks1134/CompareM>, default settings). Comparative genomics was  
152 completed using Anvi’o version 7.1 (34, 35) with the pangenomics workflow  
153 (<https://merenlab.org/2016/11/08/pangenomics-v2>) as previously reported (36). We also  
154 searched for bacteriophage in the assembled genomes of LSUCC0261, LSUCC0664, and  
155 LSUCC0723 using the Virsorter ‘Virome’ and ‘RefSeq’ databases (37). Lastly, we used CheckM  
156 v1.0.5 (33) output values for genome characteristics (coding density, GC%, predicted genes, and  
157 estimated genome size) comparison. We estimated the genome size of non-closed genomes that  
158 were at least 80% complete by multiplying the number of base pairs in the genome assembly by  
159 the inverse of the estimated completion percentage (**Table S1**).

160

#### 161 *Competitive metagenomic read recruitment*

162 To examine the distribution of genomes in aquatic systems, we selected 1,059 metagenomes for  
163 read recruitment from the following regions: Baltic Sea, Chesapeake Bay, Columbia River,  
164 Black Sea, Gulf of Mexico, Pearl River, Sappelo Island, San Francisco Bay, BioGeoTraces, Tara  
165 Oceans, and HOT (accession numbers available in **Table S1**). We conducted read mapping and  
166 calculation of normalized abundances via Reads Per Kilobase (of genome) per Million (of  
167 recruited read base pairs) (RPKM) using RRAP(38).

168

#### 169 *Growth experiments*

170 To test the salinity and temperature ranges of our isolates, we grew pure cultures in their  
171 isolation medium across a range of ionic strengths and temperatures in the dark without shaking.  
172 To test for various C, N, and S substrates that could be used by LSUCC0261, we grew the  
173 culture in a modified JW2 medium that contained a single carbon, nitrogen, and sulfur  
174 source(**Table S1**) in 96 × 2.1 mL well PTFE plates (Radleys, Essex, UK). Concentrations for the  
175 nutrient sources were added to mimic those in the original minimal media as follows: carbon 500  
176 nM, nitrogen 5 μM, sulfur 90 nM for cysteine and methionine and 500 nM for taurine. After  
177 three sequential transfers of the plates every 3-4 weeks, we transferred any wells that showed a  
178 cell signature on the flow cytometer to flasks in triplicate with the corresponding C/N/S mixtures  
179 and a higher concentration of the carbon substrate (50 μM). All cultures were re-checked for  
180 purity after the experiment concluded via Sanger sequencing of the 16S rRNA gene as described  
181 (31). Cell concentrations were enumerated using a Guava EasyCyte 5HT flow cytometer  
182 (Millipore, Massachusetts, USA) with previously reported settings (19, 31). Growth rates were  
183 calculated using sparse-growth-curve (41).

184

185 *Electron microscopy and cell size estimates*

186 LSUCC0261 was grown to  $10^6$  cells mL<sup>-1</sup> and 50mL of culture was fixed with 3%  
187 glutaraldehyde at 4°C overnight. Cells were filtered onto a 0.2µm Isopore polycarbonate  
188 membrane filter (MilliporeSigma) and dehydrated with 20 minute washes at 30%, 40%, 50%,  
189 75%, 80% ,90%, 95%, and 100% ethanol. We used a Tousimis 815 critical point drying system  
190 with 100% ethanol. The filters were then placed into a Cressington 108 sputtercoater for 45  
191 seconds and imaged on the JSM-7001F-LV scanning electron microscope at the University of  
192 Southern California Core Center of Excellence in NanoImaging (<http://cemma.usc.edu/>).  
193 LSUCC0664 was grown to  $10^6$  cells mL<sup>-1</sup> and 5 µL of culture was loaded onto a glow discharged  
194 300 mesh carbon filmed grid (EMS:CF300-cu). We removed excess liquid with filter paper after  
195 2 minutes and stained with 2% uranyl acetate (TED Pella Cat: 19481) for 1min. The samples  
196 were imaged with a JEM-1400 transmission electron microscope at Louisiana State University  
197 Shared Instrumentation Facility (<https://www.lsu.edu/sif/>). We estimated cell volumes using  
198 Pappus' centroid theorem (**Supplemental Text**).

199

200 **Results**

201

202 *New isolate genome characteristics*

203 During the course of previous large-scale culturing experiments, we isolated multiple strains of  
204 SAR11 IIIa from the northern Gulf of Mexico (23, 31). We chose three of these isolates  
205 (LSUCC0261, LSUCC0664, and LSUCC0723) for further genomic investigation based on their  
206 distribution across the 16S rRNA gene tree within SAR11 IIIa (23). Genome sequencing and  
207 assembly resulted in a single circular contig for each isolate genome. Characteristically of other  
208 SAR11 genomes, our isolate genomes are small (1.17-1.27 Mbp), with low GC content (29-  
209 30%), and high coding density (96%) (**Table 1, Fig. S1**).

210

211 *Phylogenomics, taxonomy, and genome trends*

212 Phylogenomics of 471 SAR11 genomes resolved our isolates as novel members of subclade IIIa  
213 (**Fig. S2**), and reproduced the three previously observed IIIa subgroups, delineated as IIIa.1,  
214 IIIa.2, and IIIa.3 (**Fig. 1A**). While a similar nomenclature was recently proposed (30), we have  
215 re-classified the subgroups using results from more genomes, amino acid identity (AAI), and 16S  
216 rRNA gene identity (**Fig. 1B**). Both 16S rRNA gene and AAI identities show that IIIa.1 is more  
217 similar to IIIa.2 than IIIa.3 (**Fig. 1B**). The lowest 16S rRNA gene identity within IIIa is 92.1%  
218 (**Table S1**). Genomes within a subgroup have values of at least 73% AAI to each other with a  
219 dropoff of at least 10% AAI between subgroups, which also indicates each subgroup represents  
220 genus level classification using AAI (39) (**Fig. 1A-B, Table S1**). Not all of the genomes within  
221 IIIa contained a 16S rRNA gene sequence, but those that did shared > 97% 16S rRNA sequence  
222 identity within a subgroup. This is near the ~98% sequence identity metric for species (40). We  
223 therefore propose that IIIa represents a taxonomic Family consisting of three genera.

224

### 225 *Ecological distribution*

226 We removed two non-IIIa MAGs from the SFB that contained contamination > 5% (highlighted  
227 in **Table S1**) and recruited reads from 1059 aquatic metagenomes spanning salinities of 0.07-  
228 40.2 to 469 SAR11 genomes to evaluate each genome's relative global distribution across marine  
229 and estuarine systems (**Table S1**). We categorized salinity following the Venice system (< 0.5  
230 fresh, 0.5-4.9 oligohaline, 5-17.9 mesohaline, 18-29.9 polyhaline, 30-39.9 euhaline, > 40  
231 hyperhaline) (41, 42) and summed the RPKM values by subclade within a salinity category for  
232 each metagenomic sample. Subclade IIIa overall had a wide ecological distribution with habitat  
233 specialization by subgroup (**Fig. 2A-B**). IIIa.1 was primarily a polyhaline clade with limited  
234 recruitment to sites with salinities < 18. IIIa.2 were euhaline-adapted with the lowest relative  
235 abundances of IIIa. IIIa.3 was the most abundant IIIa subgroup in salinities < 30 and appeared  
236 primarily adapted for meso/oligohaline environments **Fig. 2B**. Genomes CP31, CP15,  
237 LSUCC0261, and QL1 dominated the read recruitment in mesohaline waters and LSUCC0261  
238 was the most abundant isolate genome (**Fig. 2A**), contrasting with the previous use of  
239 IMCC9063 and HIMB114 as representatives of the subclade in metagenomic recruitment  
240 datasets (22).

241

### 242 *Genomic content of SAR11 IIIa compared to other SAR11*

243 We conducted a pangenomic analysis of all 471 SAR11 genomes to define genome content  
244 similarities and differences within IIIa and between IIIa and other SAR11 with the goals of 1)  
245 quantifying differences in metabolic potential, and 2) linking genomic variation to different  
246 ecological distributions. Our closed isolate genomes and expanded taxon selection within IIIa  
247 allowed us to define whether the previously reported genomic content from IMCC9063 and  
248 HIMB114 constituted unique or defining traits of their respective subclades. Although SAR11  
249 potentially contains ten subclades (3) or more (30), for our analysis we condensed these into the  
250 broad subclades I, II, and LD12, and excluded subclade V since its membership in SAR11 is  
251 controversial (43–47). **Fig. 3** summarizes the genomic differences among SAR11 highlighted  
252 below and the complete set of orthologous clusters is in **Table S1**.

253

254 Central carbon. IIIa had predicted genes for the pentose phosphate pathway, TCA cycle, and  
255 glucose 6-phosphate isomerase like subclades I, II, and LD12. IIIa was missing the EMP  
256 glycolysis marker gene, phosphofructokinase, that subclades II and LD12 possessed. IIIa was  
257 also missing the pyruvate kinase commonly found in LD12 and MAGs and SAGs within  
258 subclades I and II. IIIa contained pyruvate dehydrogenase (*aceEF*) like subclades I, II, and  
259 LD12. Eight genomes within IIIa contained at least two copies of *aceE*, with QL1 containing 5  
260 copies. Isocitrate lyase is the first enzyme in the glyoxylate shunt that cleaves isocitrate to  
261 glyoxylate and succinate. The glyoxylate shunt was not conserved in IIIa (**Fig. 3**), as only 2/8  
262 genomes within IIIa.1 and 5/9 genomes in IIIa.3 contained isocitrate lyase, including  
263 LSUCC0664 (IIIa.1) and LSUCC0261 (IIIa.3). However, the closed isolate genome of

264 LSUCC0723 (IIIa.1) did not contain a predicted isocitrate lyase, making it the first reported  
265 isolate missing this pathway. The second step of the glyoxylate shunt is carried out by malate  
266 synthase, which was common in IIIa and all other subclades of SAR11. Subgroup IIIa.3 uniquely  
267 contained *acyP* that breaks an acyl phosphate into a phosphate, carboxyl group, and a proton.  
268

269 C1 metabolism. Most IIIa genomes were missing formate-tetrahydrofolate (THF) ligase and  
270 formate dehydrogenase for the production of formate and CO<sub>2</sub> from the THF-linked oxidation  
271 pathway, except for CP31 (IIIa.3) which had both (**Fig. 3**). All IIIa genomes lacked the  
272 methylamine oxidation genes that were common in I/II SAR11 as previously reported for  
273 HIMB114 (8). Two IIIa.3 genomes, CP31 and LSUCC0261, and six LD12 genomes (including  
274 the closed Isolate genome LSUCC0530) contained a sodium-dependent bicarbonate transport  
275 permease in the SBT protein family. In freshwater and estuarine cyanobacteria, this protein  
276 functions as a high affinity bicarbonate transporter that concentrates inorganic carbon within the  
277 cell (48). This probable bicarbonate transporter was found only in CP31 and LSUCC0261 within  
278 IIIa.3, which were also two of the genomes that heavily recruited estuary metagenomes  
279 (**Fig.2**). Though SAR11 is not known to be able to use inorganic carbon for growth, their  
280 genomes do contain carbonic anhydrase and anaplerotic enzymes to use inorganic carbon as  
281 intermediates in segments of central carbon metabolism (49).  
282

283 Amino Acids. IIIa and LD12 had the D-alanine transaminase and alanine racemase genes to  
284 convert alanine to pyruvate, while other SAR11 did not. Twelve of twenty genomes from IIIa,  
285 including our three isolate genomes, contained *serABC* for the production of serine and glycine  
286 from glycolysis. Isolates in subclade I were notably missing the complete gene suite and were  
287 consequently reliant on external glycine and serine for their cellular requirements (10, 13), but  
288 our analysis found this gene suite present in some MAGs and SAGs within I/II and LD12 (**Fig.**  
289 **3**). IIIa and LD12 also had multiple copies of a *metE*, a B12-independent methionine synthase.  
290 Though this gene was present in I/II genomes, members of IIIa.3 and LD12 had up to three  
291 copies spanning multiple orthologous gene clusters (**Table S2**).  
292

293 Sulfur. Like all SAR11, IIIa appear dependent on reduced sulfur compounds and contained no  
294 complete assimilatory or dissimilatory sulfate reduction pathways (17, 19). I/II SAR11 were  
295 predicted to use DMSO and DMSP, but all IIIa genomes, as well as LD12, were missing *dmdA*  
296 for the use of DMSP through the demethylation pathway, confirming the previous observation in  
297 the isolate genomes IMCC9063 and HIMB114 (50).  
298

299 Nitrogen and urease. All SAR11 were predicted to use ammonia and synthesize glutamate and  
300 glutamine, though the pathways in which glutamate was synthesized were variable. Almost half  
301 of IIIa and all LD12 members had *glnB*, a part of the P-II nitrogen response system frequently  
302 found in Proteobacteria that is missing in other members of SAR11 (12) (**Fig. 3**). The P-II  
303 associated *glnD* gene was not found in any genome, so it is unclear what nitrogen response



304 differences, if any, *glnB* can confer for IIIa/LD12. We found a urease gene suite operon, *ureABC*  
305 and accessory proteins *ureEFGHJ* in the isolate LSUCC0261 (IIIa.3) genome with the  
306 nickel/peptide ABC transporter commonly found in SAR11. Functional urease operons require a  
307 nickel cofactor (51), so the presence of the urease and accessory proteins just downstream the  
308 ABC transporter indicated a likely functional gene suite, which we confirmed with growth  
309 experiments (below). Thirty-six MAGs from subclade I also contained the urease gene suite  
310 (**Table S2**). Urease in SAR11 was first reported in the Eastern Tropical North Pacific oxygen  
311 deficient zone where up to 10% of SAR11 were reported to contain the genes (52). Ours is the  
312 first reported SAR11 isolate to contain urease and the only extant member of IIIa or LD12 with  
313 these genes.

314  
315 Polyhydroxyalkanoates. We found 8/20 genomes within IIIa.1/IIIa.3 and 3/10 genomes in LD12  
316 contained *phaABC* and an associated phasin protein for the predicted production and use of  
317 polyhydroxybutyrate (or another polyhydroxyalkanoate) (**Fig. 3**). In other organisms, *phaABC*  
318 and phasin proteins allow cells to store carbon intracellularly when carbon is high but another  
319 essential component of growth such as nitrogen, phosphorous, magnesium, or oxygen is  
320 limiting/unbalanced (53). These granules also have been noted to protect cells from stressors  
321 such as temperature, reactive oxygen species, osmotic shock, oxidative stress, or UV damage  
322 (54). These genes have been reported in limited IIIa.1 genomes previously (55, 56) , but we  
323 extend this observation to additional isolates and confirm storage granule synthesis potential as a  
324 widespread phenomenon in the IIIa and LD12 subclades. Furthermore, this potential phenotype  
325 contrasts with the concept of oceanic SAR11 cells storing phosphate in an extracellular buffer  
326 (57). The selection pressure for this gene suite requires further investigation given the broad  
327 range of functions for these compounds and the generally high nutrient load of coastal and  
328 brackish waters where IIIa and LD12 predominate.

329  
330 Metals. The Fe<sup>3+</sup> ABC transporter common in subclade I/II SAR11 was found throughout IIIa.  
331 Two IIIa.1, three IIIa.3, and seven LD12 representatives as well as HIMB058 (II) also contained  
332 *efeU*, a high affinity ferrous iron (Fe<sup>2+</sup>) transporter, and IIIa.3 and LD12 members contained a  
333 ferrous-iron (Fe<sup>2+</sup>) efflux pump *fieF* for iron and zinc removal from cells (58) (**Fig. 3**). Estuarine  
334 systems have been noted to contain significant amounts of available Fe<sup>2+</sup> (59), so these genes  
335 indicate a potential iron availability niche of which some these specialized SAR11 can take  
336 advantage.

337  
338 Compatible solutes. We found GABA ( $\gamma$ -aminobutyric acid) and ectoine synthesis common  
339 throughout the SAR11 subclades, but only IIIa.3 members LSUCC0261, CP15, and CP55 (and  
340 four SAGS from other subclades) were predicted to synthesize hydroxyectoine from ectoine  
341 (**Fig. 3**). Hydroxyectoine is a broad-spectrum osmoprotective molecule for cells, can protect cells  
342 against desiccation, and its production was increased during stationary phase when grown in high  
343 salt stress in a minimal media in halophile *Virgibacillus halodenitrificans* PDB-F2 (60, 61).

344 Glycine betaine synthesis was present in I/II/IIIa and not LD12. The glycine betaine/proline  
345 transporter was present throughout IIIa, but IIIa.3 representatives LSUCC0261, CP15, and QL1  
346 were the only members that contain all the subunits, including the ATP binding subunit. This  
347 transporter was missing completely in LD12 (19). IIIa.3 members LSUCC0261 and CP15 were  
348 the only members of IIIa that could transport taurine like subclades I/II. Glycerol synthesis and  
349 transport was present in the I/II subclades, but only two IIIa.3 genomes were predicted to  
350 synthesize glycerol from glycerate and no IIIa had genes to transport glycerol. IIIa was also  
351 missing mannitol synthesis/transport, sorbitol transport, sarcosine synthesis, and TMAO  
352 synthesis though these systems are found in other I/II SAR11. These findings show IIIa  
353 contained intermediate numbers of compatible solute genes in between those of I/II and LD12  
354 (**Fig. 3**). IIIa.3 contained the most compatible solute genes within IIIa.

355  
356 Vitamins/cofactors and other genomic features. Six IIIa.3 genomes (including the isolates  
357 IMCC9063 and LSUCC0261) and three SAGs outside of IIIa contained *tenA* that should allow  
358 the cells to use AmMP rather than HMP as a source of thiamin precursor unlike other SAR11  
359 (14). This distinction is interesting because we also verified that the previously reported loss of  
360 the *thiL* gene (14) to phosphorylate thiamin monophosphate to the biologically available thiamin  
361 diphosphate (TPP) was conserved throughout subclade IIIa. Thus, although IIIa may exhibit  
362 some niched differentiation from Ia via import of a different thiamin precursor, how IIIa  
363 produces TPP for use in the cell is unresolved (**Supplemental Text**). Like other SAR11, IIIa had  
364 proteorhodopsin—IIIa.1 was a mixture of green and blue (amino acid L/Q at position 105,  
365 respectively), IIIa.2 has blue, IIIa.3 has green(**Fig. S3, Supplemental Text**). These spectral  
366 tunings correspond to the ecological distribution and source of the genomes with genomes  
367 originating from estuarine systems with mesohaline/polyhaline distributions having green.  
368 HIMB114, CP1, and AG\_894\_A09 contained two copies of proteorhodopsin belonging to two  
369 orthologous clusters (**Table S2**)— the implications of which are currently unclear and require  
370 further study. Isolates LSUCC0723, LSUCC0664, and LSUCC0261 contained no identifiable  
371 bacteriophage signatures according to Virsorter (**Table S1**).

372  
373 *Salinity and temperature growth ranges*

374 We tested the salinity tolerances of two isolates within IIIa, LSUCC0664 (IIIa.1) and  
375 LSUCC0261 (IIIa.3) to contextualize the ecological data reported above and understand whether  
376 the distribution in ecological data represents the physiological capabilities of the organisms.  
377 LSUCC0664 (IIIa.1) grew at salinities of 5.8-34.8 and LSUCC0261 (IIIa.3) grew at salinities of  
378 1.5-34.8, both with an optimum of 11.6. Though the two isolates have an overlapping salinity  
379 growth range, LSUCC0261 (IIIa.3) grew faster than LSUCC0664 (IIIa.1) at all salinities except  
380 for 23.3 and 34.8, and notably could grow at lower salinities than LSUCC0664 (**Fig. 4A**). These  
381 data indicate the IIIa subgroups are euryhaline, in distinct contrast with the sister clade LD12  
382 (19). We also tested isolate LSUCC0261 (IIIa.3) for its temperature range/optimum. It could  
383 grow at temperatures of 12-35°C with its optimum of 30°C indicating a preference for warmer

384 waters (**Fig.4B**). While rates of growth between 30-35°C were similar, LSUCC0261 grew to a  
385 higher cell density in 30°C (**Figs. 4, S3**).

386

### 387 *Minimal C, N, S requirements*

388 We grew LSUCC0261 (IIIa.3) in minimal artificial seawater media to test the isolate's ability to  
389 utilize individual carbon, nitrogen, and sulfur sources with a variety of substrate combinations  
390 (**Fig. S5-S6, Table S1**). We tested pyruvate, citrate, ribose, acetate, succinate, and  $\alpha$ -ketoglutaric  
391 acid as C sources; urea and ammonia as N sources, and cysteine, and methionine as S sources.  
392 Oxaloacetic acid, taurine, dextrose, sulfate, DMSO, and DMSP did not support growth. These  
393 results are in line with what was predicted by genomics except for oxaloacetic acid which should  
394 have been usable as a carbon source due to the presence of *maeB* and its use in isolate  
395 HTCC1062 (10). Also in contrast to our study, HTCC1062 was able to use taurine but not  
396 acetate as replacements for pyruvate (10) indicating multiple physiological differences between  
397 the two isolates.

398

### 399 *Electron Microscopy:*

400 Scanning electron microscopy for LSUCC0261 and transmission electron microscopy for  
401 LSUCC0664 showed that both cells were curved rods like that of other SAR11 and able to pass  
402 through the pores of a 0.1 $\mu$ m laser etched filter (**Fig. 5A-B**). We estimated the cells at 100-300  
403 nm thick for LSUCC0261 and 150 - 240 nm thick for LSUCC0664 (**Fig. S7K**), 0.2 - 1  $\mu$ m long  
404 for LSUCC0261 and 0.4 - 1.5  $\mu$ m long for LSUCC0664 (**Fig. S7L**), with volumes between 0.01  
405 - 0.05  $\mu$ m<sup>3</sup> for LSUCC0261 and 0.015 - 0.04  $\mu$ m<sup>3</sup> for LSUCC0664 (**Fig. S7M**). These values are  
406 in line with other estimates of SAR11 (62), thus confirming conserved morphology over large  
407 evolutionary distances in the Pelagibacterales

408

409

## 410 **Discussion**

411 This study is the first to systematically focus on SAR11 subclade IIIa and constitutes the most  
412 current pangenomic study of high-quality publicly available SAR11 genomes and their  
413 phylogenetic relationships. We have contributed multiple new pure cultures and their complete  
414 genomes, as well as high quality IIIa MAGs. Previous reports of IIIa genomic content have  
415 primarily focused on exceptions to the metabolism of other SAR11 subclades. With our  
416 expanded genome selection, we determined whether these findings were conserved features  
417 across IIIa or unique to individual isolates. Our study establishes glycine and serine prototrophy;  
418 loss of DMSO, DMSP, and much of C1 metabolism; presences of *phaABC* genes; loss of *thiL*;  
419 and a mosaic distribution of the glyoxylate shunt as conserved genomic traits within IIIa.

420

421 We furthermore confirmed several of these genomic predictions via growth physiology. The  
422 isolation of LSUCC0261, LSUCC0664, and LSUCC0723 taxa tested serine and glycine  
423 prototrophy because LSUCC0261 was isolated in JW2 medium that does not contain glycine or

424 serine, and LSUCC0664 and LSUCC0723 were isolated in an another medium, MWH2, that did  
425 not contain glycine or serine either but did have glycine betaine. HTCC1062 could oxidize  
426 glycine betaine as a replacement glycine source (10), but LSUCC0664 and LSUCC0723 do not  
427 have the genes to convert glycine betaine to glycine. Thus, the cultivation and propagation of  
428 these isolates in our media confirms glycine and serine prototrophy in IIIa. Furthermore,  
429 LSUCC0261 did not require glycine or serine in minimal medium experiments (**Fig. S4**) and  
430 could not use the reduced sulfur compounds DMSP and DMSO like other SAR11 (28).

431  
432 This study is the first reported growth of a SAR11 isolate using urea as a sole nitrogen source.  
433 Uptake of labeled urea by SAR11 has been observed *in situ* and the urease can be common in  
434 OMZ SAR11 (52). While we only observed the urease gene suite in one IIIa genome  
435 (LSUCC0261), these SAR11 urease genes were found throughout San Francisco Bay water  
436 column metagenomes (**Fig. S8-S9**), suggesting that this metabolism is important for estuarine  
437 SAR11. Future work will be needed to: determine whether LSUCC0261 uses urea as a source of  
438 nitrogen, carbon, or both; explore the frequency of urease in coastal populations; and identify the  
439 circumstances by which urease offers a competitive advantage in SAR11.

440  
441 Far from being a monolithic subclade with universal features, we propose that subclade IIIa  
442 represents a Family within the Order Pelagibacterales and that the subgroups are equivalent to  
443 genera defined by both 16S rRNA gene identity and AAI (**Fig. 1**)(39, 40) . The genera also had  
444 unique spatio-temporal distributions (**Fig. 2B**), which aligns with our understanding of the  
445 historical delineation of different SAR11 ecotypes (3, 6, 30, 63). Previous studies defined three  
446 phylogenetic branches represented by HIMB114 as a coastal branch (IIIa.1), IMCC9063 (IIIa.3)  
447 as a mesohaline branch, and an uncultured oceanic branch between them (3, 22). Our expanded  
448 taxon selection and comparison to more than a thousand metagenomes refines our understanding  
449 of subclade distribution. While IIIa.3 was the most abundant of the subgroups overall, these  
450 organisms preferred slightly lower salinities than IIIa.1, and IIIa.2 was primarily a marine group.  
451 Such fine-scale salinity differentiation was supported by physiological data. The IIIa.1 isolate  
452 LSUCC0664 could not grow at the lowest salinities possible for LSUCC0261 (IIIa.3) (**Fig. 4**).  
453 LSUCC0261 was also best adapted to intermediate salinities, whereas LSUCC0664 grew much  
454 better by comparison in higher salinities (**Fig. 4**).

455  
456 There is important metabolic diversity between the subgroups within IIIa, with IIIa.3 being the  
457 most distinct. Several metabolic traits were unique to IIIa.3 or shared only with the freshwater  
458 LD12 clade. In addition to the ability to transport  $Fe^{3+}$  via ABC transport as other SAR11, IIIa  
459 can use a high affinity ferrous iron ( $Fe^{2+}$ ) transporter and IIIa.3/LD12 can pump  $Fe^{2+}$  and zinc  
460 from cells (58). IIIa.3 contained *acyP* that cleaves acyl-phosphate into a phosphate and  
461 carboxylate which may serve as a parallel evolutionary tactic to scavenge phosphate similarly to  
462 the methyl phosphonate cleavage in Ia genomes like HTCC7211 (64) or could act simply as an  
463 additional way to recycle acetate for the cell's central carbon metabolism. IIIa.3 has the potential

464 for AmMP to fulfil thiamin requirements instead of being reliant on HMP like most other  
465 SAR11(14) due to the presence of *tenA*. In a recent survey of thiamin-related compound  
466 concentrations in the North Atlantic, AmMP was found in similar but higher concentrations than  
467 HMP at multiple marine stations (65). This represents a crucial niche-differentiating step for  
468 IIIa.3 from other SAR11, including the sister groups IIIa.1 and IIIa.2 that are likely reliant on  
469 HMP (14). Subclade IIIa's conserved deletion of *thiL*, which converts thiamin monophosphate  
470 (TP) to the biologically usable thiamin diphosphate (TPP), remains inexplicable as it appears that  
471 these organisms still require thiamin diphosphate. For example, eight genomes spanning the  
472 three subgroups within IIIa have multiple gene copies of the *aceE* E1 component of pyruvate  
473 dehydrogenase and QL1 has five copies. This is notable because gene duplications in SAR11 are  
474 limited (8), and also because *aceE* needs thiamin diphosphate as a cofactor to combine  
475 thiamin diphosphate and pyruvate to make acetyl-CoA (66). It is thus likely that a currently  
476 unannotated gene can complete this final conversion. One possible candidate is an adenylate  
477 kinase found in all SAR11 that can convert thiamin diphosphate to thiamin triphosphate (67).  
478 Combined, these notable metabolic shifts in IIIa.3 probably allow for the subclade to exploit  
479 environmental resources that other SAR11 are unable to use and contribute to the ecological  
480 success of the group relative to the other groups in IIIa.

481  
482 Truly estuarine-adapted taxa are believed to be rare compared to marine and freshwater versions  
483 (68). Prior research from river outlets debated whether estuarine-adapted lineages could truly  
484 exist or whether the community members in estuarine zones are simply a mixture of freshwater  
485 and marine communities because the short residence times of estuarine water make an  
486 established community unlikely (69). However, a true brackish community in the Baltic Sea  
487 between salinities of 5-8 was distinct from fresh and salty community members (70). The  
488 physiology, ecological distribution, gene content, and sister position of IIIa to LD12 all support  
489 the concept of an estuarine origin of the last common ancestor for IIIa/LD12. Subsequently, one  
490 subgroup of IIIa remained truly estuarine-adapted (IIIa.3), whereas the other subgroups  
491 diversified into increasingly higher salinity niches over time (IIIa.1 and IIIa.2). While marine to  
492 freshwater transitions are rare (71), freshwater to marine transitions are perhaps even more rare.  
493 Bacteria such as the Methylophilaceae have recently been documented to have freshwater origins  
494 for marine relatives (72) and some diatoms such as the Thalassiosirales have extensive marine to  
495 freshwater transitions followed by subsequent marine transitions(73). While IIIa appears to be a  
496 transitional clade diversifying from estuarine waters back to marine systems, more genomes  
497 and further research into physiology and biogeography are needed to improve our understanding  
498 of the evolutionary origins and trajectory of this group.

499  
500 More generally, subclade IIIa represents an intermediate group in the SAR11 evolutionary  
501 transition from marine to fresh water. These organisms inhabit a wide range of salinities but are  
502 brackish water specialists and share a most recent common ancestor with the exclusively fresh  
503 and low-brackish water subclade LD12. The last common ancestor of all SAR11 is believed to

504 be a streamlined, marine organism (74), and we currently hypothesize that a key evolutionary  
505 step that allowed the colonization of fresh water occurred through the loss of osmolyte transport  
506 genes (for glycine-betaine, proline, ectoine, and hydroxyectoine) in the LD12 branch (19). The  
507 tradeoff for this gene loss was that LD12 was prevented from reinhabiting salty waters (19). We  
508 can use the knowledge of subclade IIIa gained from this study to speculate on this evolutionary  
509 transition further. The two isolates, LSUCC0261 and LSUCC0664, have a euryhaline growth  
510 range. While this is noteworthy by itself, it is perhaps more important that LSUCC0261 cannot  
511 grow in the lowest salinity media, i.e., fresh water. What prevents this growth at the freshest  
512 salinities remains an important question. Key features of SAR11 are small, streamlined genomes  
513 that have a comparative dearth of regulatory capability (9) and a high number of constitutively  
514 expressed genes (75). It is possible that the constitutive expression of the very same osmolyte  
515 transport genes that were lost in LD12 prevents IIIa cells from reducing their ionic strength  
516 sufficiently to inhabit fresh water.

517  
518 The path of SAR11 evolution from the marine clades to LD12 would follow thusly:  
519 specialization for brackish water habitats first occurred at the branch between all SAR11 and the  
520 last common ancestor of IIIa/LD12. These organisms were distributed very near freshwater  
521 environments but could not permanently colonize them due to constitutive gene expression of  
522 osmolyte transport genes that prevented sufficient reduction in intracellular salinity. Loss of  
523 these transport genes then allowed the LD12 group to disperse into fresh water, but the absence  
524 of these genes prevented rapid equilibration to higher salinities in the event of re-dispersal back  
525 to marine waters, isolating LD12 as a freshwater group (19). We are currently investigating this  
526 hypothesis with isolates from IIIa and LD12. And while the evolutionary trajectory for LD12  
527 may pass through the common ancestor of IIIa and LD12 as outlined above, there is  
528 accumulating evidence that the ostensibly exclusively marine SAR11 groups may also colonize  
529 freshwater environments either sporadically, at very low abundances, or both (76, 77)

530  
531 Overall, this study represents the most complete analysis of SAR11 IIIa thus far and is a  
532 necessary steppingstone in the understanding of SAR11 IIIa, its role in estuarine systems, and its  
533 intermediate place in the evolution of SAR11 from marine to freshwater environments. Future  
534 work on IIIa is needed to contextualize functions of noted gene losses and gains, the mode in  
535 which IIIa interacts with thiamin derivatives, and the extent at which IIIa members interact with  
536 nutrient dynamics in estuaries including urea and production of polyhydroxyalkanoates.

### 537 538 **Data Availability Statement**

539 Assembled isolate genomes for LSUCC0261, LSUCC0664, and LSUCC0723 are available on  
540 IMG under Genome IDs 2728369215, 2770939455, and 2739368061, respectively. Raw isolate  
541 genome reads are available on NCBI under accession PRJNA864866. Metagenome assembled  
542 genomes from the San Francisco Bay are available on NCBI under BioSample accessions  
543 SAMN30106608-SAMN30106615. The accessory datasheets from this publication including the

544 pangenome summary are hosted through FigShare  
545 (<https://figshare.com/account/home#/projects/144939>). Cryostocks of isolates used in this  
546 analysis are available upon request.

547

#### 548 **Conflict of Interests**

549 The authors declare that they have no conflict of interest.

550

#### 551 **Acknowledgements**

552 We would like to thank the Louisiana State University Shared Instrumentation Facility (SIF) and  
553 the University of Southern California Center for Electron Microscopy and Microanalysis  
554 (CEMMA) for training and availability of electron microscopes to image our isolates. We would  
555 also like to thank Dr. Casey Barr for training on the scanning electron microscope and Dr. Ying  
556 for her operation of the transmission electron microscope. The authors acknowledge the Center  
557 for Advanced Research Computing (CARC) at the University of Southern California for  
558 providing computing resources that have contributed to the research results reported within this  
559 publication. URL: <https://carc.usc.edu>, as well as high-performance computing resources  
560 provided by Louisiana State University (<http://www.hpc.lsu.edu>), and the Stanford Research  
561 Computing Center for providing computing resources that have contributed to the research  
562 results reported within this publication. This work was supported by a Simons Early Career  
563 Investigator in Marine Microbial Ecology and Evolution Award, and NSF Biological  
564 Oceanography Program grants (OCE-1747681 and OCE-1945279) to J.C.T.

565

566

#### 567 **Figure Captions**

568 **Table 1:** Genome statistics of new IIIa isolates compared to other SAR11 genomes. Genome size  
569 estimates were calculated by multiplying the assembly size by the inverse of the estimated  
570 completion from CheckM (33).

571

572 **Figure 1:** Subclade structure and genome similarity. **A)** Phylogeny and ANI/AAI pairwise  
573 comparison of SAR11 IIIa and IIIb. The phylogeny is a subset of the phylogenomic tree found in  
574 **Supplemental Figure 1**. Node values are indicators of bootstrap support (n=1000). **B)** 16S  
575 rRNA gene BLAST identity vs AAI. Gray bars indicate the species and genera definitions using  
576 AAI (78) and 16S (40) where noted.

577

578 **Figure 2:** Distribution of subclade IIIa and LD12 in metagenomic datasets. **A)** Metagenomic  
579 recruitment to IIIa and IIIb/LD12 genomes at sites with salinities  $\leq 32$ . Tiles represent a  
580 metagenomic sample that are arranged by increasing salinity on the x-axis. Colors on each tile  
581 represent the Reads Per Kilobase (of genome) per Million (of recruited read base pairs)  
582 (RPKM) values at the site. Colors on the x-axis indicate the category of salinity the sample  
583 belongs to classified by the Venice system(42). **B)** Boxplot of RPKM values summed by

584 subclade for each metagenomic sample grouped by subclade and colored by salinity category.  
585 The insert displays log transformed summed RPKM values for subclade IIIa.

586  
587 **Figure 3:** Highlighted comparative gene content in SAR11. Pathways or genes mentioned in text  
588 as being differential between subclades are arranged in order of their appearance. Colors indicate  
589 the proportion of genomes in a subclade in which the gene/pathway is present in. The asterisk  
590 indicates the “all” classification allows for the gene to be missing in limited MAGs or SAGs in  
591 subclades I/II since the number of taxa belonging to this group is so large.

592  
593 **Figure 4:** Physiology experiments. **A)** Growth rates and doubling times of LSUCC0664 (IIIa.1)  
594 in orange and LSUCC0723 (IIIa.3) in blue in media of varying salinities. **B)** Growth rate and  
595 doubling times of LSUCC0261 (IIIa.1) in JW2 medium grown at varying temperatures.

596  
597 **Figure 5:** Electron microscopy. **A)** Scanning electron microscopy image of a single LSUCC0261  
598 cell. **B)** Scanning electron microscopy image of many LSUCC0261 cells and cellular debris. **C)**  
599 Transmission electron microscopy image of a single LSUCC0664 cell likely mid-division.

600  
601 **Supplemental Text 1:** Supplemental Methods, Results, and Discussion.

602  
603 **Supplemental Table 1:** Accessory data used in this publication including: GTDB accessions,  
604 CheckM statistics, and estimated genome size for all genomes, table of noted genomic features in  
605 text, 16S blast hits of IIIa, ANI and AAI matrix of IIIa, AAI vs BLAST of IIIa, detailed gene  
606 searches corresponding to previous publications, table of KO numbers that differ between  
607 LSUCC isolate genomes, Anvi'o enriched pfam and KO, Virsorter outputs for isolates, input  
608 table for sparse\_growth\_curve.py to calculate growth rates from salinity and temperature  
609 experiments, growth data for minimal media experiment, minimal media setup, metagenomic  
610 recruitment RPKM values, and collected metadata for the datasets used in recruitment.  
611 Supplemental Table 1 is hosted at: <https://doi.org/10.6084/m9.figshare.20415831>.

612  
613 **Supplemental Table 2:** Anvi'o pangenomic summary of 471 SAR11 genomes annotated with  
614 the following sources from KEGG and Interproscan: Gene3D, SUPERFAMILY, TIGRFAM,  
615 KEGG\_Class, KOfam, ProSiteProfiles, Pfam, CDD, Hamap, PANTHER, KEGG\_Module,  
616 PIRSF, SMART, ProSitePatterns, Coils, MobiDBLite, PRINTS, SFLD. Supplemental Table 2 is  
617 hosted at: <https://doi.org/10.6084/m9.figshare.20415843>.

618  
619 **Supplemental Table 3:** Cell sizes measurements and estimations in **Fig. S7**. Supplemental Table  
620 3 is hosted at: <https://doi.org/10.6084/m9.figshare.20415852>.

621  
622 **Figure S1:** Boxplots of genome characteristics of LSUCC isolates compared to other SAR11.  
623



624 **Figure S2:** Phylogenomic tree of 471 SAR11 genomes that are a combination of newly-added  
625 genomes and publicly available. Node values are indicators of 1000 bootstrap support.

626

627 **Figure S3:** Multiple sequence alignment of IIIa proteorhodopsin with key spectral tuning  
628 position boxed in red.

629

630 **Figure S4:** LSUCC0261 growth at different temperatures. Points indicate the average of three  
631 replicates and error bars indicate the standard deviation of cell counts for three replicates  
632 measured.

633

634 **Figure S5:** LSUCC0261 growth in different minimal media. Points indicate the average of three  
635 replicates and error bars indicate the standard deviation of cell counts for three replicates  
636 measured.

637

638

639 **Figure S6:** Growth rates of LSUCC0261 grown in different minimal medium combinations.

640

641 **Figure S7:** Calculations of cell sizes. For example with the annotation in (G): we have the same  
642 circles covering the entire cell shape. The radii ( $R = 45\text{px} = 88\text{nm}$ , half of the cell thickness) of  
643 the identical circles includes the two half-spheres and the curved cylinder, from which we can  
644 calculate the volume of the two half-spheres (in total,  $4/3\pi R^3 = 0.0029 \mu\text{m}^3$ ). We then connect  
645 the centers of the circles. The length of the connection line ( $l = 633.7 \text{ px} = 1239 \text{ nm}$ ) is the length  
646 of the curved cylinder. According to Pappus' centroid theorem, the volume of the curved  
647 cylinder is  $\pi l R^2 = 0.0301 \mu\text{m}^3$ . We then get the total cell volume as  $0.033 \mu\text{m}^3$ . We applied this  
648 method to all the cells in the images. (A) – (D) are the scanning electron microscopic images for  
649 LSUCC0261. (E) and (F) are the transmission electron microscopic images for LSUCC0261.  
650 (G) – (J) are the transmission electron microscopic images of LSUCC0664. (G) and (I) are two  
651 identical images, where (G) is being annotated as a whole single cell while (I) is annotated as  
652 two newborn cells since due to the presence of a likely septum. As the result, (K) — (M) are  
653 showing the distributions of cell radius, lengths, and volumes. The data for making the violin  
654 plots are in **Table S3**.

655

656 **Figure S8:** Phylogeny of the UreC sequences from the San Francisco Bay (SFB) with the  
657 LSUCC0261 sequence highlighted.

658

659 **Figure S9:** Plot of BLAST hit percent identities between the SFB UreC sequences and the  
660 LSUCC0261 UreC organized by samples with increasing salinities.

661

662

663

664 **References**

665

- 666 1. Schattener M, Fuchs BM, Amann R, Zubkov MV, Tarran GA, Pernthaler J. 2009.  
667 Latitudinal distribution of prokaryotic picoplankton populations in the Atlantic Ocean.  
668 *Environ Microbiol* 11:2078–2093.
- 669 2. Morris RM, Frazar CD, Carlson CA. 2012. Basin-scale patterns in the abundance of SAR11  
670 subclades, marine Actinobacteria (OM1), members of the Roseobacter clade and OCS116  
671 in the South Atlantic. *Environ Microbiol* 14:1133–1144.
- 672 3. Vergin KL, Beszteri B, Monier A, Thrash JC, Temperton B, Treusch AH, Kilpert F,  
673 Worden AZ, Giovannoni SJ. 2013. High-resolution SAR11 ecotype dynamics at the  
674 Bermuda Atlantic Time-series Study site by phylogenetic placement of pyrosequences.  
675 *ISME J* 7:1322–1332.
- 676 4. Stingl U, Tripp HJ, Giovannoni SJ. 2007. Improvements of high-throughput culturing  
677 yielded novel SAR11 strains and other abundant marine bacteria from the Oregon coast and  
678 the Bermuda Atlantic Time Series study site. *ISME J* 361–371.
- 679 5. Rappé MS, Connon S a., Vergin KL, Giovannoni SJ. 2002. Cultivation of the ubiquitous  
680 SAR11 marine bacterioplankton clade. *Nature* 418:630–633.
- 681 6. Giovannoni SJ. 2017. SAR11 Bacteria: The Most Abundant Plankton in the Oceans. *Ann*  
682 *Rev Mar Sci* 9:231–255.
- 683 7. Giovannoni SJ, Tripp HJ, Givan S, Podar M, Vergin KL, Baptista D, Bibbs L, Eads J,  
684 Richardson TH, Noordewier M, Rappé MS, Short JM, Carrington JC, Mathur EJ. 2005.

- 685 Genome streamlining in a cosmopolitan oceanic bacterium. *Science* 309:1242–1245.
- 686 8. Grote J, Thrash JC, Huggett MJ. 2012. Streamlining and Core Genome Conservation among  
687 Highly Divergent Members of the SAR11 Clade 3:1–13.
- 688 9. Giovannoni SJ, Cameron Thrash J, Temperton B. 2014. Implications of streamlining theory  
689 for microbial ecology. *ISME J* 8:1553–1565.
- 690 10. Carini P, Steindler L, Beszteri S, Giovannoni SJ. 2013. Nutrient requirements for growth of  
691 the extreme oligotroph ‘*Candidatus Pelagibacter ubique*’ HTCC1062 on a defined medium.  
692 *ISME J* 7:592–602.
- 693 11. Smith DP, Kitner JB, Norbeck AD, Clauss TR, Lipton MS, Michael S, Steindler L, Nicora  
694 CD, Smith RD, Giovannoni SJ. 2010. Transcriptional and Translational Regulatory  
695 Responses to Iron Limitation in the Globally Distributed Marine Bacterium *Candidatus*  
696 *Pelagibacter ubique* 5.
- 697 12. Smith DP, Thrash JC, Nicora CD, Lipton MS, Burnum-Johnson KE, Carini P, Smith RD,  
698 Giovannoni SJ. 2013. Proteomic and Transcriptomic Analysis of “*Candidatus Pelagibacter*  
699 *ubique*” Describe the First P II -Independent Response to Nitrogen Limitation in a Free-  
700 Living Alphaproteobacterium. *MBio* 4:1–11.
- 701 13. Tripp HJ, Schwalbach MS, Meyer MM, Kitner JB, Breaker RR, Giovannoni SJ. 2009.  
702 Unique glycine-activated riboswitch linked to glycine--serine auxotrophy in SAR11.  
703 *Environ Microbiol* 11:230–238.
- 704 14. Carini P, Campbell EO, Morré J, Sañudo-Wilhelmy SA, Cameron Thrash J, Bennett SE,

- 705 Temperton B, Begley T, Giovannoni SJ. 2014. Discovery of a SAR11 growth requirement  
706 for thiamin's pyrimidine precursor and its distribution in the Sargasso Sea. *ISME J* 8:1727–  
707 1738.
- 708 15. Sun J, Steindler L, Thrash JC, Halsey KH, Smith DP, Carter AE, Landry ZC, Giovannoni  
709 SJ. 2011. One carbon metabolism in SAR11 pelagic marine bacteria. *PLoS One* 6.
- 710 16. Delmont TO, Kiefl E, Kilinc O, Esen OC, Uysal I, Rappé MS, Giovannoni S, Murat Eren  
711 A. 2019. Single-amino acid variants reveal evolutionary processes that shape the  
712 biogeography of a global SAR11 subclade <https://doi.org/10.7554/eLife.46497.001>.
- 713 17. Thrash JC, Temperton B, Swan BK, Landry ZC, Woyke T, DeLong EF, Stepanauskas R,  
714 Giovannoni SJ. 2014. Single-cell enabled comparative genomics of a deep ocean SAR11  
715 bathytype. *ISME J* 8:1440–1451.
- 716 18. Tsementzi D, Wu J, Deutsch S, Nath S, Rodriguez-R LM, Burns AS, Ranjan P, Sarode N,  
717 Malmstrom RR, Padilla CC, Stone BK, Bristow LA, Larsen M, Glass JB, Thamdrup B,  
718 Woyke T, Konstantinidis KT, Stewart FJ. 2016. SAR11 bacteria linked to ocean anoxia and  
719 nitrogen loss. *Nature* 536:179–183.
- 720 19. Henson MW, Lanclos VC, Faircloth BC, Thrash JC. 2018. Cultivation and genomics of the  
721 first freshwater SAR11 (LD12) isolate. *ISME J* 12:1846–1860.
- 722 20. Tsementzi D, Rodriguez-R LM, Ruiz-Perez CA, Meziti A, Hatt JK, Konstantinidis KT.  
723 2019. Ecogenomic characterization of widespread, closely-related SAR11 clades of the  
724 freshwater genus “*Candidatus Fonsibacter*” and proposal of *Ca. Fonsibacter lacus* sp. nov.  
725 *Syst Appl Microbiol* 42:495–505.

- 726 21. Oh HM, Kang I, Lee K, Jang Y, Lim SI, Cho JC. 2011. Complete genome sequence of  
727 strain IMCC9063, belonging to SAR11 subgroup 3, isolated from the Arctic Ocean. *J*  
728 *Bacteriol* 193:3379–3380.
- 729 22. Herlemann DPR, Woelk J, Labrenz M, Jürgens K. 2014. Diversity and abundance of  
730 “Pelagibacterales” (SAR11) in the Baltic Sea salinity gradient. *Syst Appl Microbiol*  
731 37:601–604.
- 732 23. Henson MW, Lanclos VC, Pitre DM, Weckhorst JL, Lucchesi AM, Cheng C, Temperton B,  
733 Thrash JC. 2020. Expanding the diversity of bacterioplankton isolates and modeling  
734 isolation efficacy with large-scale dilution-to-extinction cultivation. *Appl Environ*  
735 *Microbiol* 86.
- 736 24. Rasmussen AN, Damashek J, Eloë-Fadrosh EA, Francis CA. 2020. In-depth Spatiotemporal  
737 Characterization of Planktonic Archaeal and Bacterial Communities in North and South San  
738 Francisco Bay. *Microb Ecol* <https://doi.org/10.1007/s00248-020-01621-7>.
- 739 25. Brown MV, Fuhrman JA. 2005. Marine bacterial microdiversity as revealed by internal  
740 transcribed spacer analysis. *Aquatic Microbial Ecology* <https://doi.org/10.3354/ame041015>.
- 741 26. Schwalbach MS, Tripp HJ, Steindler L, Smith DP, Giovannoni SJ. 2010. The presence of  
742 the glycolysis operon in SAR11 genomes is positively correlated with ocean productivity.  
743 *Environ Microbiol* 12:490–500.
- 744 27. Malmstrom RR, Kiene RP, Cottrell MT, Kirchman DL. 2004. Contribution of SAR11  
745 bacteria to dissolved dimethylsulfoniopropionate and amino acid uptake in the North  
746 Atlantic ocean. *Appl Environ Microbiol* 70:4129–4135.

- 747 28. Tripp HJ, Kitner JB, Schwalbach MS, Dacey JWH, Wilhelm LJ, Giovannoni SJ. 2008.  
748 SAR11 marine bacteria require exogenous reduced sulphur for growth. *Nature* 452:741–  
749 744.
- 750 29. Smith DP, Nicora CD, Carini P, Lipton MS, Norbeck AD, Smith RD, Giovannoni SJ. 2016.  
751 Proteome Remodeling in Response to Sulfur Limitation in “*Candidatus Pelagibacter*  
752 *ubique*.” *mSystems* 1.
- 753 30. Haro-Moreno JM, Rodriguez-Valera F, Rosselli R, Martinez-Hernandez F, Roda-Garcia JJ,  
754 Gomez ML, Fornas O, Martinez-Garcia M, López-Pérez M. 2019. Ecogenomics of the  
755 SAR11 clade. *Environ Microbiol* <https://doi.org/10.1111/1462-2920.14896>.
- 756 31. Henson MW, Pitre DM, Weckhorst JL, Lanclos VC, Webber AT, Thrash JC. 2016.  
757 Artificial Seawater Media Facilitate Cultivating Members of the Microbial Majority from  
758 the Gulf of Mexico. *mSphere* 1:1–10.
- 759 32. Bankevich A, Nurk S, Antipov D, Gurevich AA, Dvorkin M, Kulikov AS, Lesin VM,  
760 Nikolenko SI, Pham SON, Prjibelski AD, Pyshkin AV, Sirotkin AV, Vyahhi N, Tesler G,  
761 Alekseyev MAXA, Pevzner PA. 2012. and Its Applications to Single-Cell Sequencing  
762 19:455–477.
- 763 33. Parks DH, Imelfort M, Skennerton CT, Hugenholtz P, Tyson GW. 2015. CheckM: assessing  
764 the quality of microbial genomes recovered from isolates, single cells, and metagenomes.  
765 *Genome Res* 25:1043–1055.
- 766 34. Eren AM, Esen ÖC, Quince C, Vineis JH, Morrison HG, Sogin ML, Delmont TO. 2015.  
767 Anvi’o: an advanced analysis and visualization platform for ’omics data. *PeerJ* 3:e1319.

- 768 35. Eren AM, Kiefl E, Shaiber A, Veseli I, Miller SE, Schechter MS, Fink I, Pan JN, Yousef M,  
769 Fogarty EC, Trigodet F, Watson AR, Esen ÖC, Moore RM, Clayssen Q, Lee MD, Kivenson  
770 V, Graham ED, Merrill BD, Karkman A, Blankenberg D, Eppley JM, Sjödin A, Scott JJ,  
771 Vázquez-Campos X, McKay LJ, McDaniel EA, Stevens SLR, Anderson RE, Fuessel J,  
772 Fernandez-Guerra A, Maignien L, Delmont TO, Willis AD. 2021. Community-led,  
773 integrated, reproducible multi-omics with anvio. *Nat Microbiol* 6:3–6.
- 774 36. Savoie ER, Lanclos VC, Henson MW, Cheng C, Getz EW, Barnes SJ, LaRowe DE, Rappé  
775 MS, Thrash JC. 2021. Ecophysiology of the Cosmopolitan OM252 Bacterioplankton  
776 (Gammaproteobacteria). *mSystems* e0027621.
- 777 37. Roux S, Enault F, Hurwitz BL, Sullivan MB. 2015. VirSorter: mining viral signal from  
778 microbial genomic data. *PeerJ* 3:e985.
- 779 38. Conner Y. Kojima, Eric W. Getz, and J. Cameron Thrash. 2022. RPKM Recruitment  
780 Analysis Pipeline. Submitted.
- 781 39. Konstantinidis KT, Tiedje JM. 2005. Towards a genome-based taxonomy for prokaryotes. *J*  
782 *Bacteriol* 187:6258–6264.
- 783 40. Yarza P, Yilmaz P, Pruesse E, Glöckner FO, Ludwig W, Schleifer K-H, Whitman WB,  
784 Euzéby J, Amann R, Rosselló-Móra R. 2014. Uniting the classification of cultured and  
785 uncultured bacteria and archaea using 16S rRNA gene sequences. *Nat Rev Microbiol*  
786 12:635–645.
- 787 41. 1958. The Venice system for the classification of marine waters according to salinity.  
788 *Limnol Oceanogr* 3:346–347.

- 789 42. Battaglia. Final resolution of the symposium on the classification of brackish waters. *Archo*  
790 *Oceanography Limnology*.
- 791 43. Thrash JC, Boyd A, Huggett MJ, Grote J, Carini P, Yoder RJ, Robbertse B, Spatafora JW,  
792 Rappé MS, Giovannoni SJ. 2011. Phylogenomic evidence for a common ancestor of  
793 mitochondria and the SAR11 clade. *Sci Rep* 1:13.
- 794 44. Ferla MP, Thrash JC, Giovannoni SJ, Patrick WM. 2013. New rRNA gene-based  
795 phylogenies of the Alphaproteobacteria provide perspective on major groups, mitochondrial  
796 ancestry and phylogenetic instability. *PLoS One* 8:e83383.
- 797 45. Viklund J, Martijn J, Ettema TJG, Andersson SGE. 2013. Comparative and phylogenomic  
798 evidence that the alphaproteobacterium HIMB59 is not a member of the oceanic SAR11  
799 clade. *PLoS One* 8:e78858.
- 800 46. Martijn J, Vosseberg J, Guy L, Offre P, Ettema TJG. 2018. Deep mitochondrial origin  
801 outside the sampled alphaproteobacteria. *Nature* 557:101–105.
- 802 47. Muñoz-Gómez SA, Susko E, Williamson K, Eme L, Slamovits CH, Moreira D, López-  
803 García P, Roger AJ. 2022. Site-and-branch-heterogeneous analyses of an expanded dataset  
804 favour mitochondria as sister to known Alphaproteobacteria. *Nat Ecol Evol* 6:253–262.
- 805 48. Kaczmarek JA, Hong N-S, Mukherjee B, Wey LT, Rourke L, Förster B, Peat TS, Price  
806 GD, Jackson CJ. 2019. Structural Basis for the Allosteric Regulation of the SbtA  
807 Bicarbonate Transporter by the PII-like Protein, SbtB, from *Cyanobium* sp. PCC7001.  
808 *Biochemistry* 58:5030–5039.



- 809 49. Alonso-Sáez L, Galand PE, Casamayor EO, Pedrós-Alió C, Bertilsson S. 2010. High  
810 bicarbonate assimilation in the dark by Arctic bacteria. *ISME J* 4:1581–1590.
- 811 50. Sun J, Todd JD, Thrash JC, Qian Y, Qian MC, Temperton B, Guo J, Fowler EK, Aldrich  
812 JT, Nicora CD, Lipton MS, Smith RD, De Leenheer P, Payne SH, Johnston AWB, Davie-  
813 Martin CL, Halsey KH, Giovannoni SJ. 2016. The abundant marine bacterium *Pelagibacter*  
814 simultaneously catabolizes dimethylsulfoniopropionate to the gases dimethyl sulfide and  
815 methanethiol. *Nature Microbiology* 1:16065.
- 816 51. Veaudor T, Cassier-Chauvat C, Chauvat F. 2019. Genomics of Urea Transport and  
817 Catabolism in Cyanobacteria: Biotechnological Implications. *Front Microbiol* 10:2052.
- 818 52. Widner B, Fuchsman CA, Chang BX, Rocap G, Mulholland MR. 2018. Utilization of urea  
819 and cyanate in waters overlying and within the eastern tropical north Pacific oxygen  
820 deficient zone. *FEMS Microbiol Ecol* 94.
- 821 53. Sudesh K, Abe H, Doi Y. 2000. Synthesis, structure and properties of  
822 polyhydroxyalkanoates: biological polyesters. *Prog Polym Sci* 25:1503–1555.
- 823 54. Obruca S, Sedlacek P, Koller M, Kucera D, Pernicova I. 2018. Involvement of  
824 polyhydroxyalkanoates in stress resistance of microbial cells: Biotechnological  
825 consequences and applications. *Biotechnol Adv* 36:856–870.
- 826 55. Oh S, Zhang R, Wu QL, Liu WT. 2016. Evolution and adaptation of SAR11 and  
827 *Cyanobium* in a saline Tibetan lake. *Environ Microbiol Rep* 8:595–604.
- 828 56. Campbell BJ, Lim SJ, Kirchman DL. 2022. Controls of SAR11 subclade abundance,

- 829 diversity, and growth in two Mid-Atlantic estuaries. bioRxiv.
- 830 57. Zubkov MV, Martin AP, Hartmann M, Grob C, Scanlan DJ. 2015. Dominant oceanic  
831 bacteria secure phosphate using a large extracellular buffer. *Nat Commun* 6.
- 832 58. Huang K, Wang D, Frederiksen RF, Rensing C, Olsen JE, Fresno AH. 2017. Investigation  
833 of the Role of Genes Encoding Zinc Exporters *zntA*, *zitB*, and *fiuF* during *Salmonella*  
834 *Typhimurium* Infection. *Front Microbiol* 8:2656.
- 835 59. Hopwood MJ, Statham PJ, Skrabal SA, Willey JD. 2015. Dissolved iron(II) ligands in river  
836 and estuarine water. *Mar Chem* 173:173–182.
- 837 60. Czech L, Hermann L, Stöveken N, Richter A, Höppner A, Smits S, Heider J, Bremer E.  
838 2018. Role of the Extremolytes Ectoine and Hydroxyectoine as Stress Protectants and  
839 Nutrients: Genetics, Phylogenomics, Biochemistry, and Structural Analysis. *Genes*  
840 <https://doi.org/10.3390/genes9040177>.
- 841 61. Tao P, Li H, Yu Y, Gu J, Liu Y. 2016. Ectoine and 5-hydroxyectoine accumulation in the  
842 halophile *Virgibacillus halodenitrificans* PDB-F2 in response to salt stress. *Appl Microbiol*  
843 *Biotechnol* 100:6779–6789.
- 844 62. Zhao X, Schwartz CL, Pierson J, Giovannoni SJ, McIntosh JR, Nicastro D. 2017. Three-  
845 Dimensional Structure of the Ultraoligotrophic Marine Bacterium “*Candidatus Pelagibacter*  
846 *ubique*.” *Appl Environ Microbiol* 83.
- 847 63. Giovannoni S, Stingl U. 2007. The importance of culturing bacterioplankton in the “omics”  
848 age. *Nat Rev Microbiol* 5:820–826.

- 849 64. Carini P, White AE, Campbell EO, Giovannoni SJ. 2014. Methane production by  
850 phosphate-starved SAR11 chemoheterotrophic marine bacteria. *Nat Commun* 5:4346.
- 851 65. Suffridge CP, Bolaños LM, Bergauer K, Worden AZ, Morré J, Behrenfeld MJ, Giovannoni  
852 SJ. 2020. Exploring Vitamin B1 Cycling and Its Connections to the Microbial Community  
853 in the North Atlantic Ocean. *Frontiers in Marine Science* 7.
- 854 66. Patel MS, Nemeria NS, Furey W, Jordan F. 2014. The pyruvate dehydrogenase complexes:  
855 structure-based function and regulation. *J Biol Chem* 289:16615–16623.
- 856 67. Shikata H, Koyama S, Egi Y, Yamada K, Kawasaki T. 1989. Cytosolic adenylate kinase  
857 catalyzes the synthesis of thiamin triphosphate from thiamin diphosphate. *Biochem Int*  
858 18:933–941.
- 859 68. Day JW Jr, Michael Kemp W, Yáñez-Arancibia A, Crump BC. 2012. *Estuarine Ecology*.  
860 John Wiley & Sons.
- 861 69. Crump BC, Hopkinson CS, Sogin ML, Hobbie JE. 2004. Microbial biogeography along an  
862 estuarine salinity gradient: combined influences of bacterial growth and residence time.  
863 *Appl Environ Microbiol* 70:1494–1505.
- 864 70. Herlemann DP, Labrenz M, Jürgens K, Bertilsson S, Waniek JJ, Andersson AF. 2011.  
865 Transitions in bacterial communities along the 2000 km salinity gradient of the Baltic Sea.  
866 *ISME J* 5:1571–1579.
- 867 71. Logares R, Bråte J, Bertilsson S, Clasen JL, Shalchian-Tabrizi K, Rengefors K. 2009.  
868 Infrequent marine-freshwater transitions in the microbial world. *Trends Microbiol* 17:414–

- 869 422.
- 870 72. Ramachandran A, McLatchie S, Walsh DA. 2021. A Novel Freshwater to Marine  
871 Evolutionary Transition Revealed within Methylophilaceae Bacteria from the Arctic Ocean.  
872 MBio 12:e0130621.
- 873 73. Alverson AJ, Jansen RK, Theriot EC. 2007. Bridging the Rubicon: phylogenetic analysis  
874 reveals repeated colonizations of marine and fresh waters by thalassiosiroid diatoms. Mol  
875 Phylogenet Evol 45:193–210.
- 876 74. Luo H. 2015. Evolutionary origin of a streamlined marine bacterioplankton lineage. ISME J  
877 9:1423–1433.
- 878 75. Cottrell MT, Kirchman DL. 2016. Transcriptional Control in Marine Copiotrophic and  
879 Oligotrophic Bacteria with Streamlined Genomes. Appl Environ Microbiol 82:6010–6018.
- 880 76. Paver SF, Muratore D, Newton RJ, Coleman ML. 2018. Reevaluating the Salty Divide:  
881 Phylogenetic Specificity of Transitions between Marine and Freshwater Systems. mSystems  
882 3.
- 883 77. Cabello-Yeves PJ, Picazo A, Camacho A, Callieri C, Rosselli R, Roda-Garcia JJ, Coutinho  
884 FH, Rodriguez-Valera F. 2018. Ecological and genomic features of two widespread  
885 freshwater picocyanobacteria. Environ Microbiol 20:3757–3771.
- 886 78. Konstantinidis KT, Tiedje JM. 2007. Prokaryotic taxonomy and phylogeny in the genomic  
887 era: advancements and challenges ahead. Curr Opin Microbiol 10:504–509.

| Genome                | LSUCC0664 | LSUCC0723 | LSUCC0261 | Other IIIa  | Other SAR11 |
|-----------------------|-----------|-----------|-----------|-------------|-------------|
| Subclade              | IIIa.1    | IIIa.1    | IIIa.3    | IIIa        | I,II,LD12   |
| Contigs in Assembly   | 1         | 1         | 1         | 1-122       | 1-288       |
| Completion(%)*        | 100       | 100       | 100       | 52.38-99.78 | 50.94-100   |
| Est. Contamination(%) | 0         | 0         | 0         | 0-5.95      | 0-4.67      |
| GC(%)                 | 30        | 29        | 30        | 28-32       | 28-36       |
| Genome Size (Mbp)**   | 1.17      | 1.2       | 1.27      | 0.89-1.52   | 0.94-1.75   |
| Coding density (%)    | 96        | 96        | 96        | 80-97       | 92-97       |
| Predicted genes       | 1256      | 1309      | 1330      | 658-1894    | 654-1788    |

\*Completion criteria of >80% for subclade I/II genomes from GTDB-Tk

\*\*Estimated for genomes that were not closed

**Table 1:** Genome statistics of new IIIa isolates compared to other SAR11 genomes. Genome size estimates were calculated by multiplying the assembly size by the inverse of the estimated completion from CheckM (33).

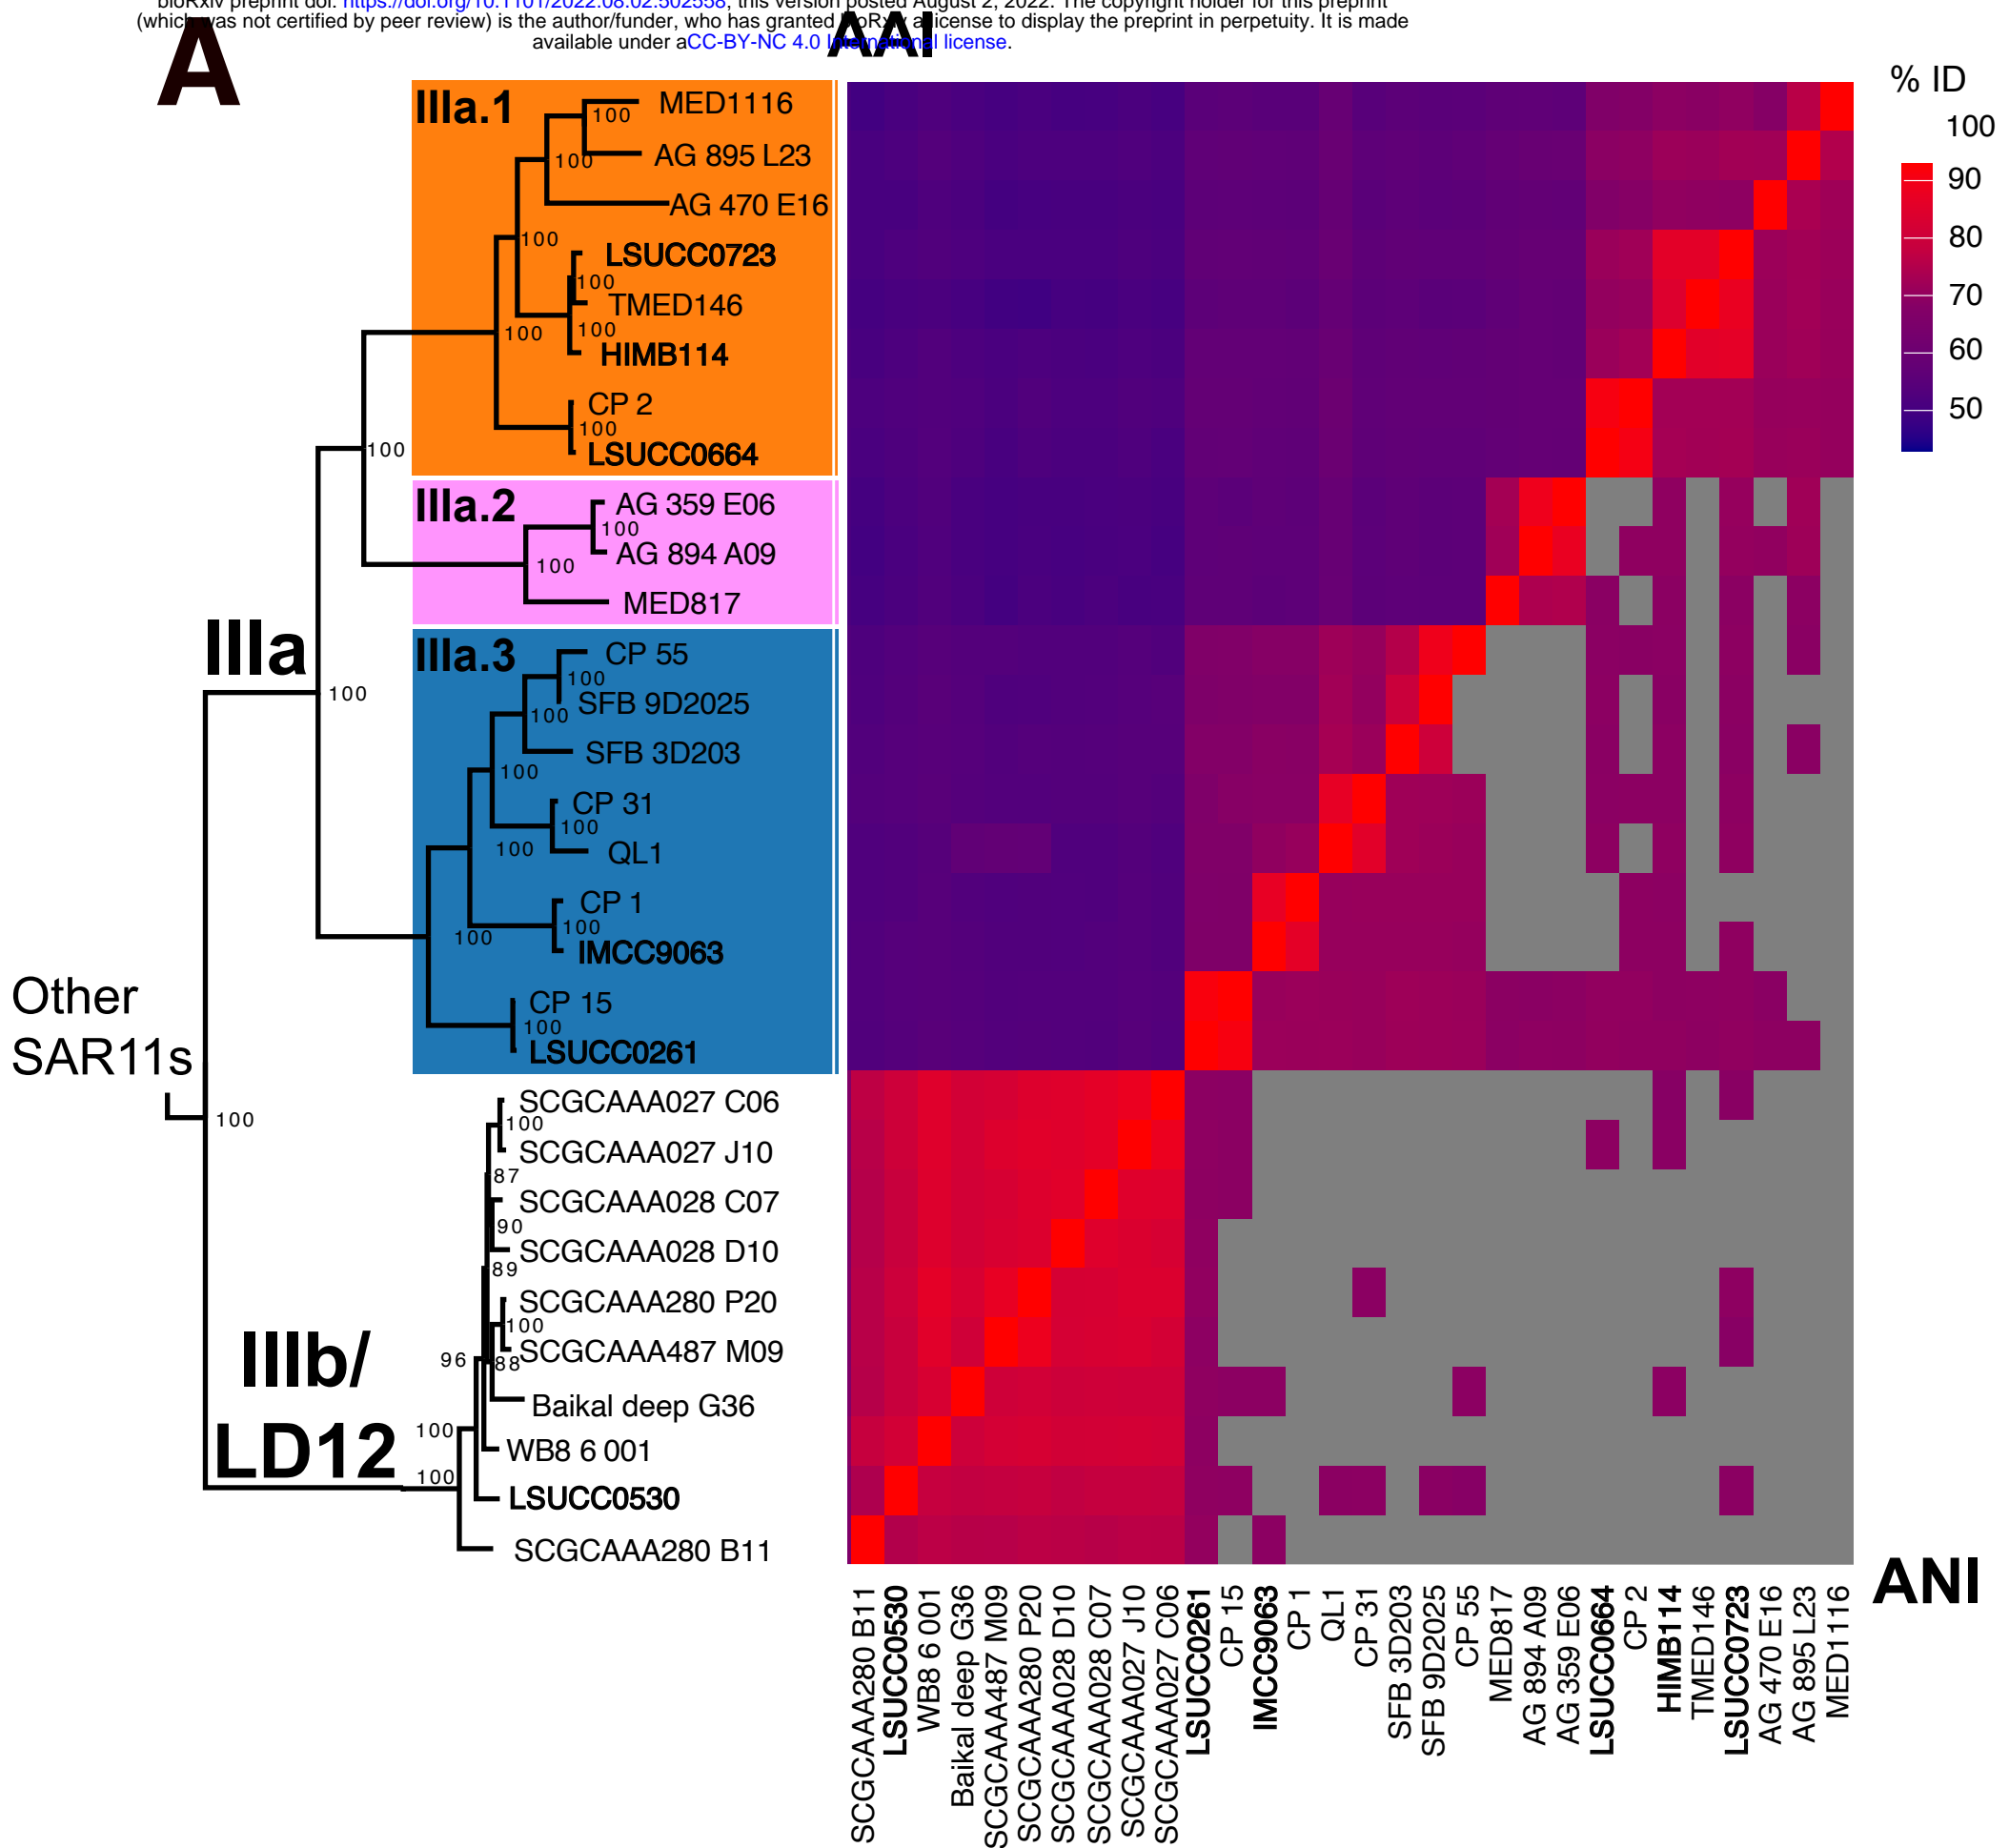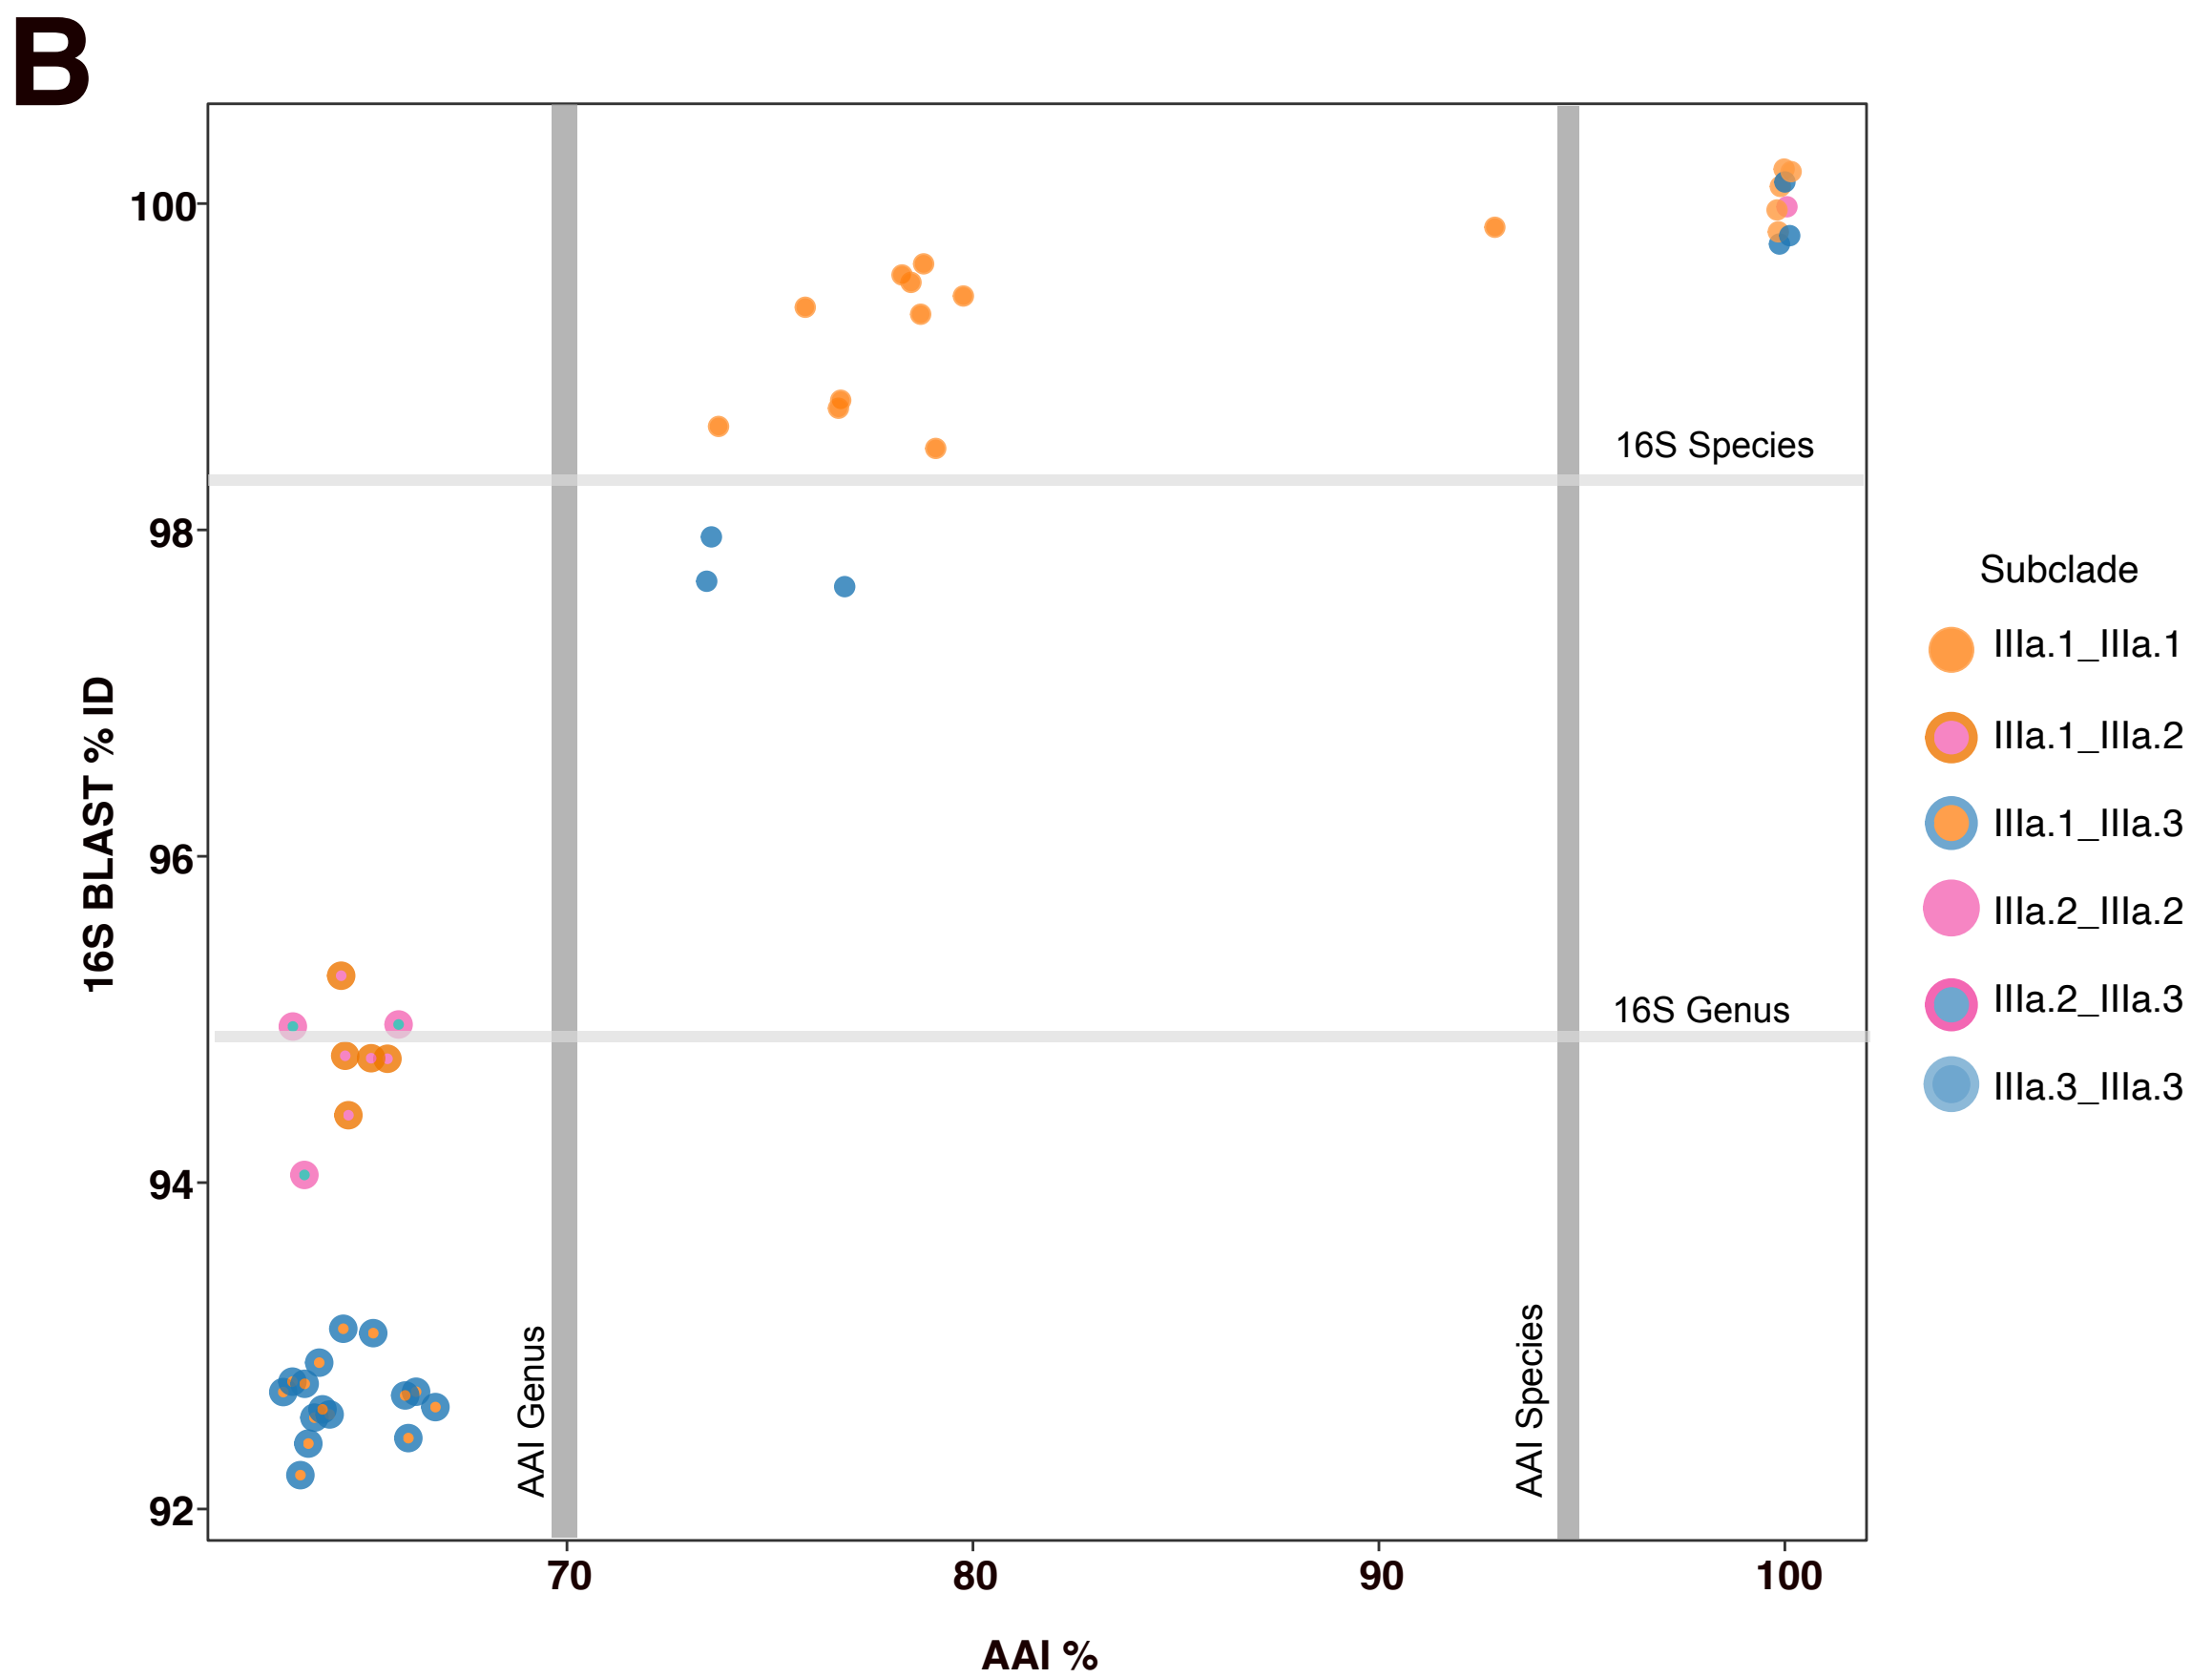

**Figure 1:** Subclade structure and genome similarity. **A**) Phylogeny and ANI/AAI pairwise comparison of SAR11 IIIa and IIIb. The phylogeny is a subset of the phylogenomic tree found in **Supplemental Figure 1**. Node values are indicators of bootstrap support (n=1000). **B**) 16S rRNA gene BLAST identity vs AAI. Gray bars indicate the species and genera definitions using AAI (78) and 16S (40) where noted.

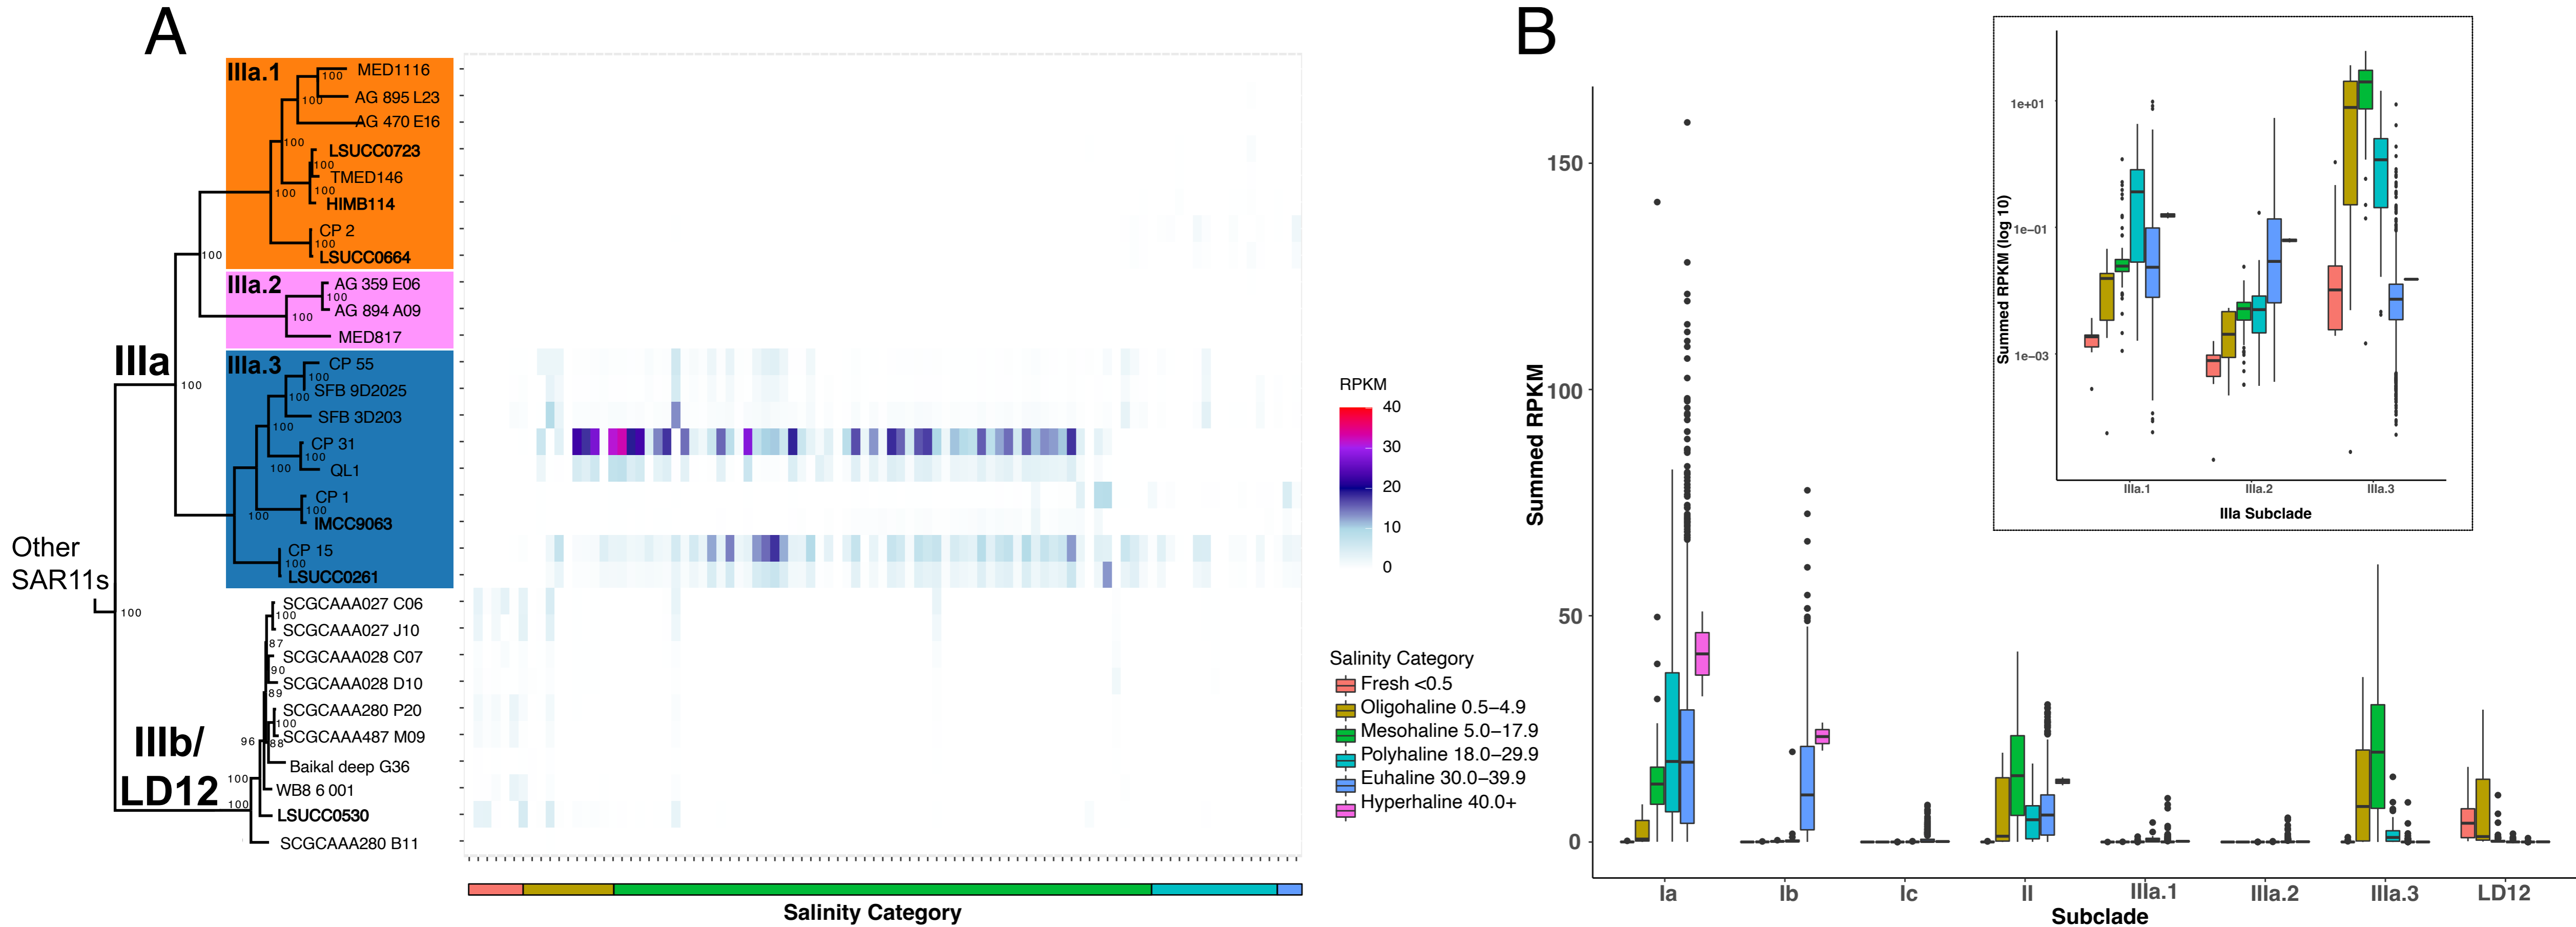

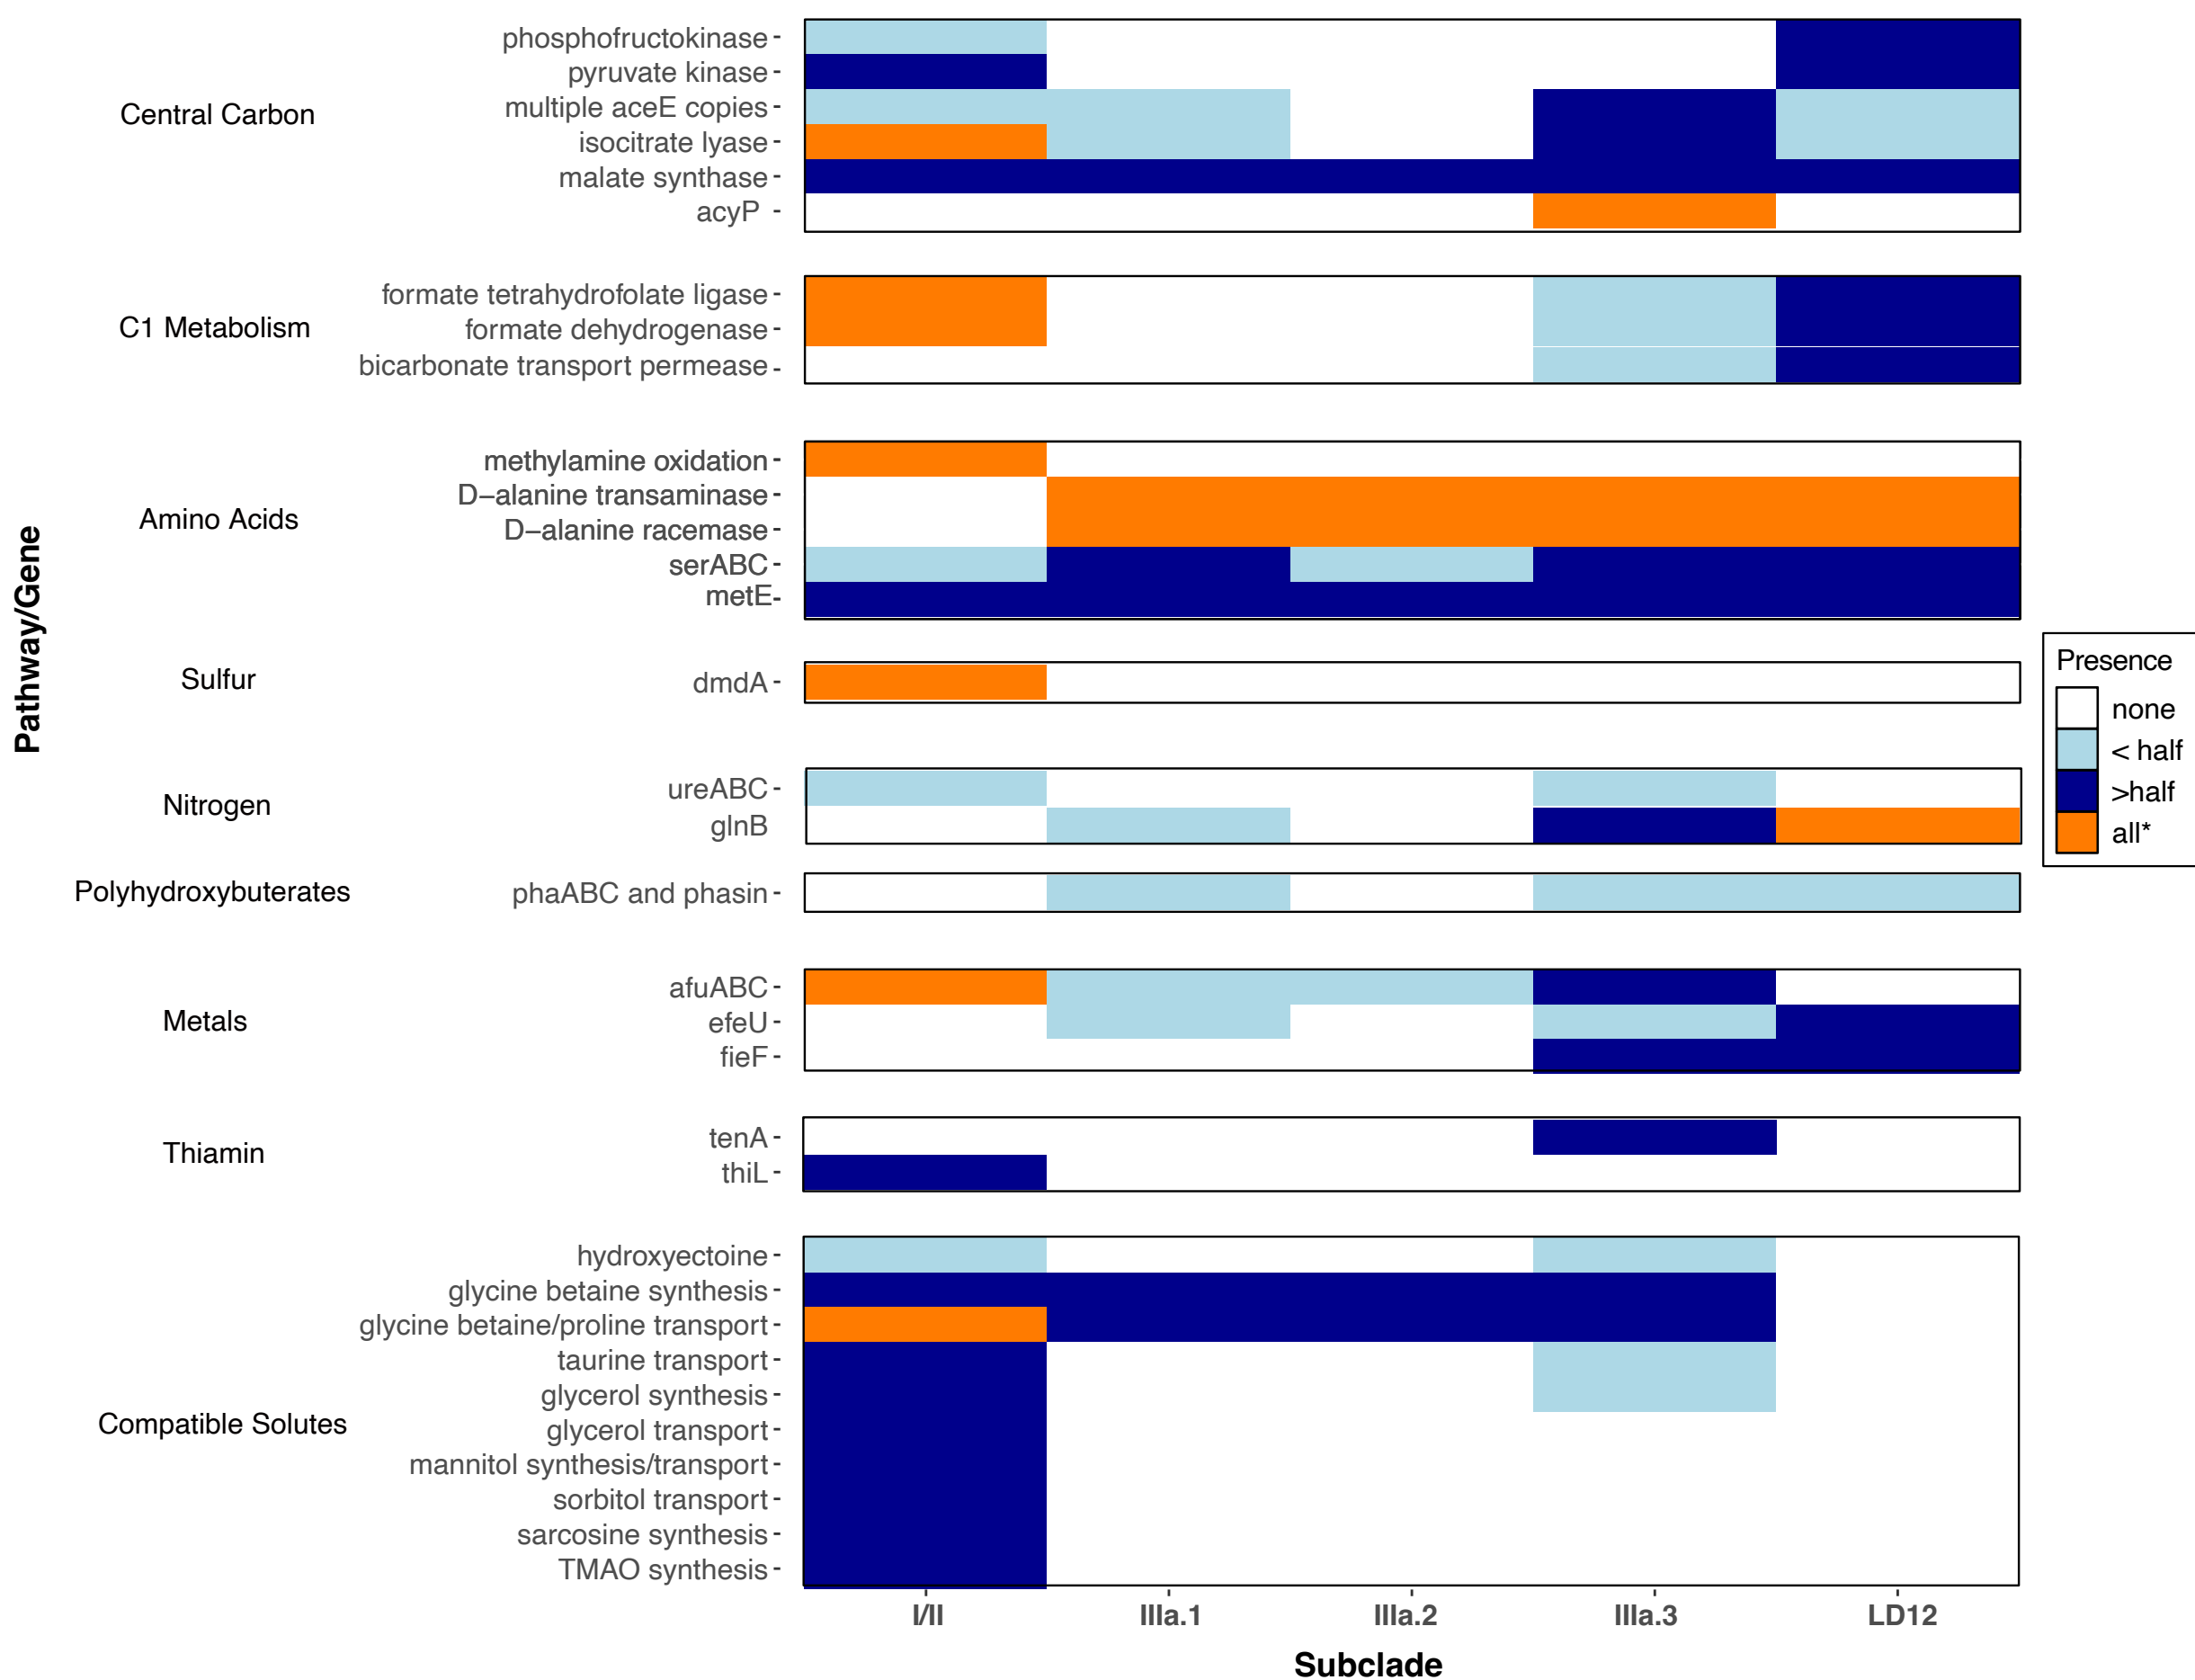

**Figure 3:** Highlighted comparative gene content in SAR11. Pathways or genes mentioned in text as being differential between subclades are arranged in order of their appearance. Colors indicate the proportion of genomes in a subclade in which the gene/pathway is present in. The asterisk indicates the “all” classification allows for the gene to be missing in limited MAGs or SAGs in subclades I/II since the number of taxa belonging to this group is so large.



**A**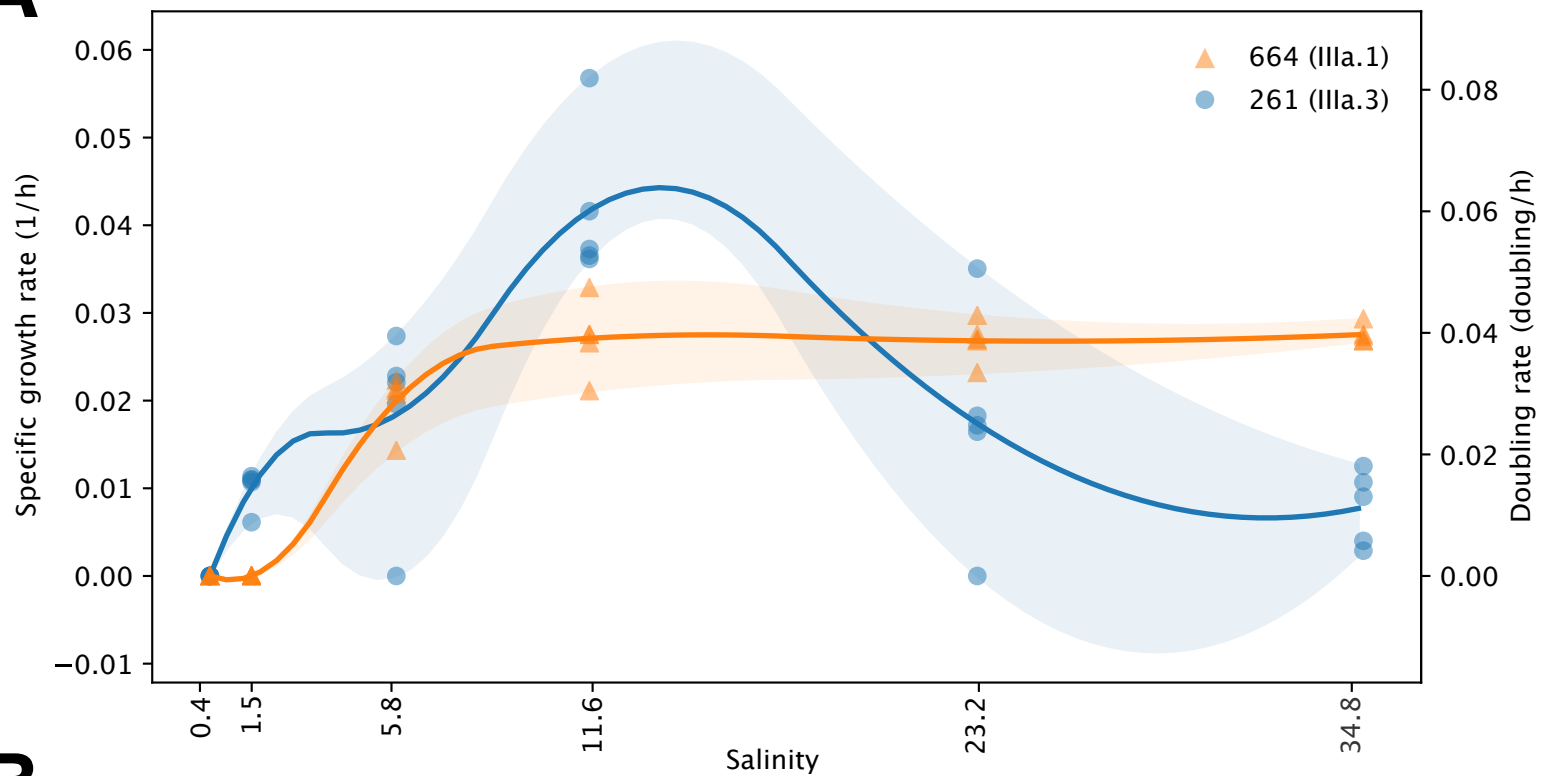**B**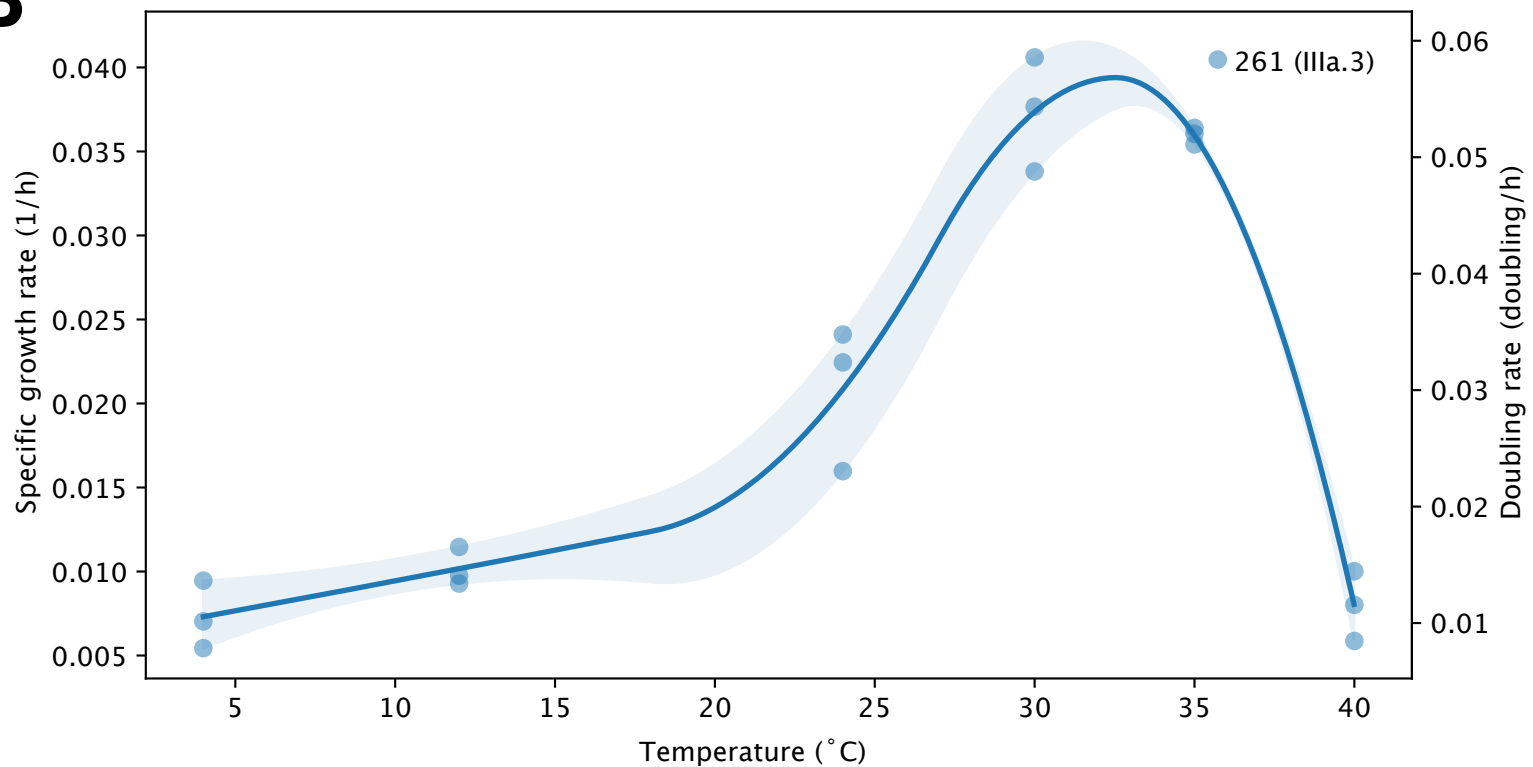

**Figure 4:** Physiology experiments. **A)** Growth rates and doubling times of LSUCC0664 (IIIa.1) in orange and LSUCC0723 (IIIa.3) in blue in media of varying salinities. **B)** Growth rate and doubling times of LSUCC0261 (IIIa.1) in JW2 medium grown at varying temperatures.

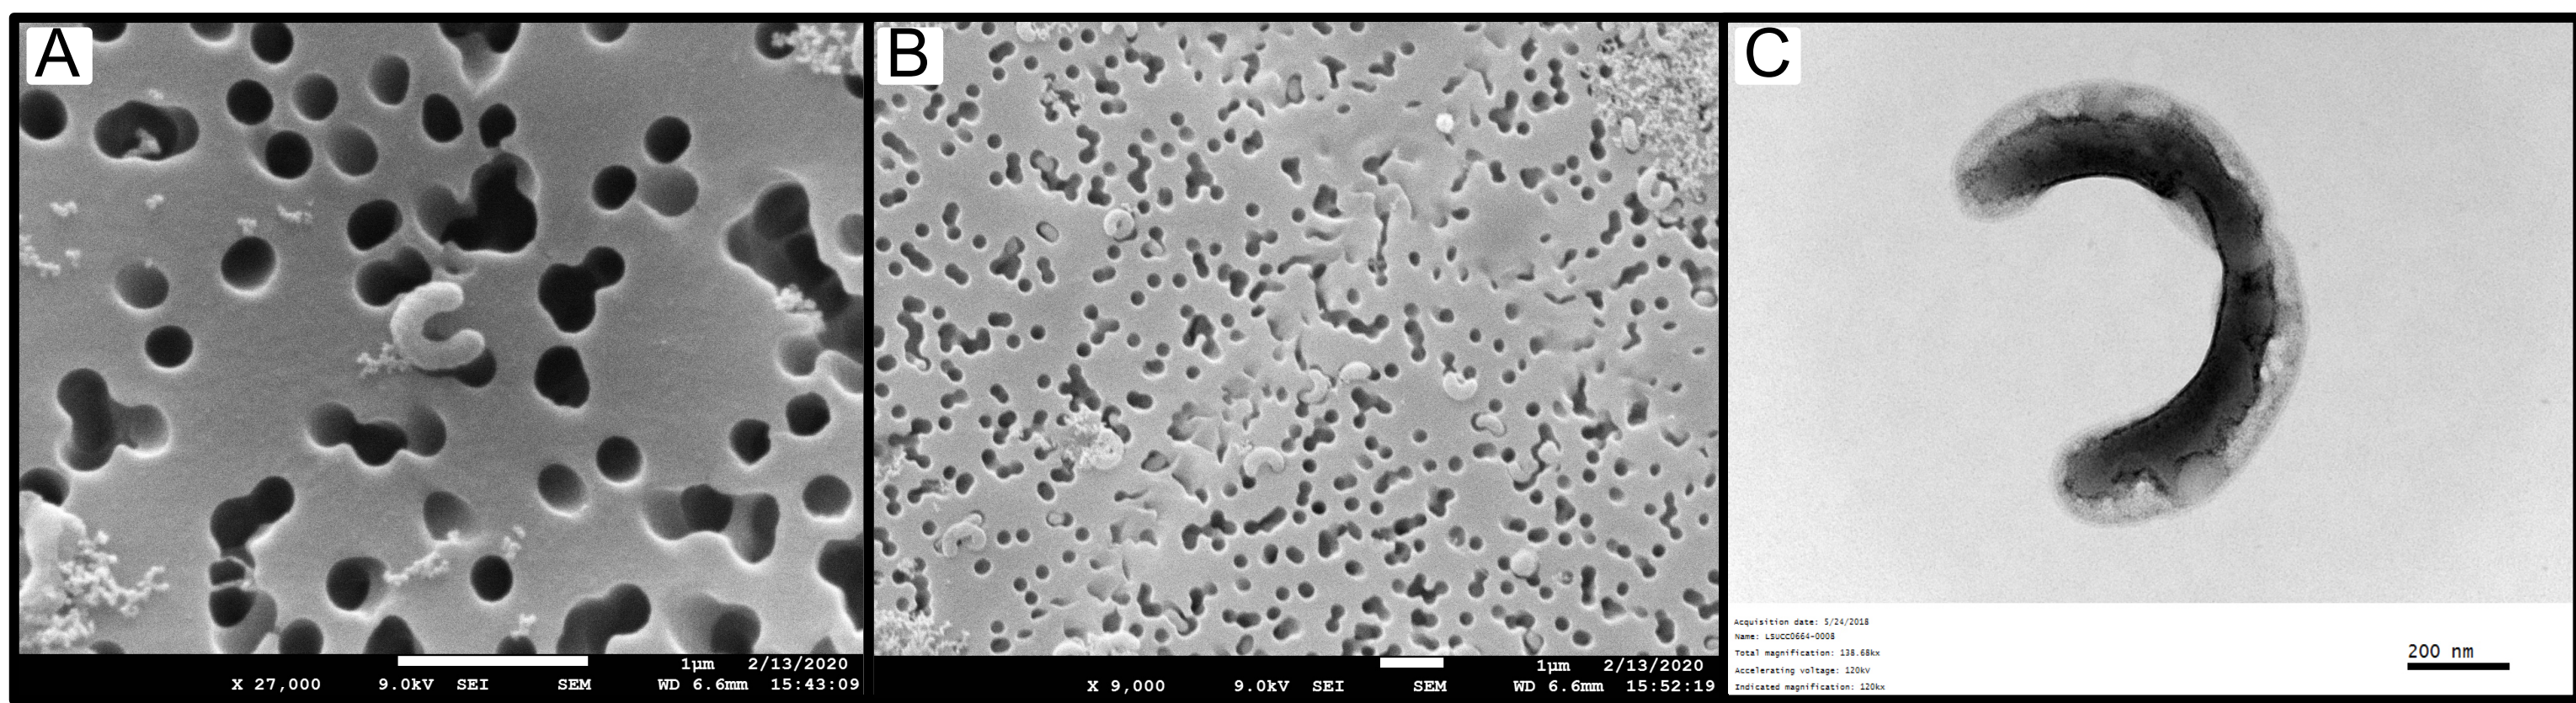

**Figure 5:** Electron microscopy. **A)** Scanning electron microscopy image of a single LSUCC0261 cell. **B)** Scanning electron microscopy image of many LSUCC0261 cells and cellular debris. **C)** Transmission electron microscopy image of a single LSUCC0664 cell likely mid-division.
